# Supplementary material for: Isolation and characterization of related impurities in andrographolide sodium bisulphite injection
Source: Royal Society of Chemistry journal article supplement (doi:10.1039/c5ra28178d), 2016-01-01
Supplement: c5ra28178d1.pdf [file c5ra28178d1.pdf]

## **Isolation and characterization of related impurities in andrographolide sodium bisulphite injection**

### Index

#### Compound 1:

**S1.** <sup>1</sup>H NMR spectrum of compound 1 (300 MHz, CD<sub>3</sub>OD)

**S2.** <sup>13</sup>C NMR spectrum of compound 1 (75 MHz, CD<sub>3</sub>OD)

**S3.** <sup>1</sup>H-<sup>1</sup>H COSY spectrum of compound 1

**S4.** HSQC spectrum of compound 1

**S5.** HMBC spectrum of compound 1

**S6.** ROESY spectrum of compound 1

**S7.** HRESIMS spectrum of compound 1

**S8.** IR spectrum of compound 1

**S9.** UV spectrum of compound 1 (MeOH)

#### Compound 2:

**S10.** <sup>1</sup>H NMR spectrum of compound 2 (300 MHz, DMSO-*d*<sub>6</sub>)

**S11.** <sup>13</sup>C NMR spectrum of compound 2 (75 MHz, DMSO-*d*<sub>6</sub>)

**S12.** <sup>1</sup>H-<sup>1</sup>H COSY spectrum of compound 2

**S13.** HSQC spectrum of compound 2

**S14.** HMBC spectrum of compound 2

**S15.** ROESY spectrum of compound 2

**S16.** HRESIMS spectrum of compound 2

**S17.** IR spectrum of compound 2

**S18.** Mo<sub>2</sub>(OAc)<sub>4</sub>-induced circular dichroism (ICD) spectrum of compound 2

#### Compound 3:

**S19.** <sup>1</sup>H NMR spectrum of compound 3 (300 MHz, CD<sub>3</sub>OD)

**S20.** <sup>13</sup>C NMR spectrum of compound 3 (75 MHz, CD<sub>3</sub>OD)

**S21.** <sup>1</sup>H-<sup>1</sup>H COSY spectrum of compound 3

**S22.** HSQC spectrum of compound 3

**S23.** HMBC spectrum of compound 3

**S24.** ROESY spectrum of compound 3

**S25.** HRESIMS spectrum of compound 3

**S26.** IR spectrum of compound 3

**S27.** UV spectrum of compound 3 (MeOH)

**S28.** CD spectrum of compound 3 (MeOH)

#### Compound 4:

**S29.** <sup>1</sup>H NMR spectrum of compound 4 (300 MHz, CD<sub>3</sub>OD)

**S30.** <sup>13</sup>C NMR spectrum of compound 4 (75 MHz, CD<sub>3</sub>OD)

**S31.** HRESIMS spectrum of compound 4

**S32.** IR spectrum of compound 4

**S33.** UV spectrum of compound 4 (MeOH)

#### Compound 5:

**S34.**  $^1\text{H}$  NMR spectrum of compound **5** (300 MHz,  $\text{CD}_3\text{OD}$ )

**S35.**  $^{13}\text{C}$  NMR spectrum of compound **5** (75 MHz,  $\text{CD}_3\text{OD}$ )

**S36.**  $^1\text{H}$ - $^1\text{H}$  COSY spectrum of compound **5**

**S37.** HSQC spectrum of compound **5**

**S38.** HMBC spectrum of compound **5**

**S39.** ROESY spectrum of compound **5**

**S40.** HRESIMS spectrum of compound **5**

**S41.** IR spectrum of compound **5**

**S42.** UV spectrum of compound **5** (MeOH)

**S43.** CD spectrum of compound **5** (MeOH)

Compound **6**:

**S44.**  $^1\text{H}$  NMR spectrum of compound **6** (300 MHz,  $\text{CD}_3\text{OD}$ )

**S45.**  $^{13}\text{C}$  NMR spectrum of compound **6** (75 MHz,  $\text{CD}_3\text{OD}$ )

**S46.**  $^1\text{H}$ - $^1\text{H}$  COSY spectrum of compound **6**

**S47.** HSQC spectrum of compound **6**

**S48.** HMBC spectrum of compound **6**

**S49.** ROESY spectrum of compound **6**

**S50.** HRESIMS spectrum of compound **6**

**S51.** IR spectrum of compound **6**

**S52.** UV spectrum of compound **6** (MeOH)

**S53.** CD spectrum of compound **6** (MeOH)

S1. <sup>1</sup>H NMR spectrum of compound 1 (300 MHz, CD<sub>3</sub>OD)

AP-B H1-NMR CD3OD 300K AV-300

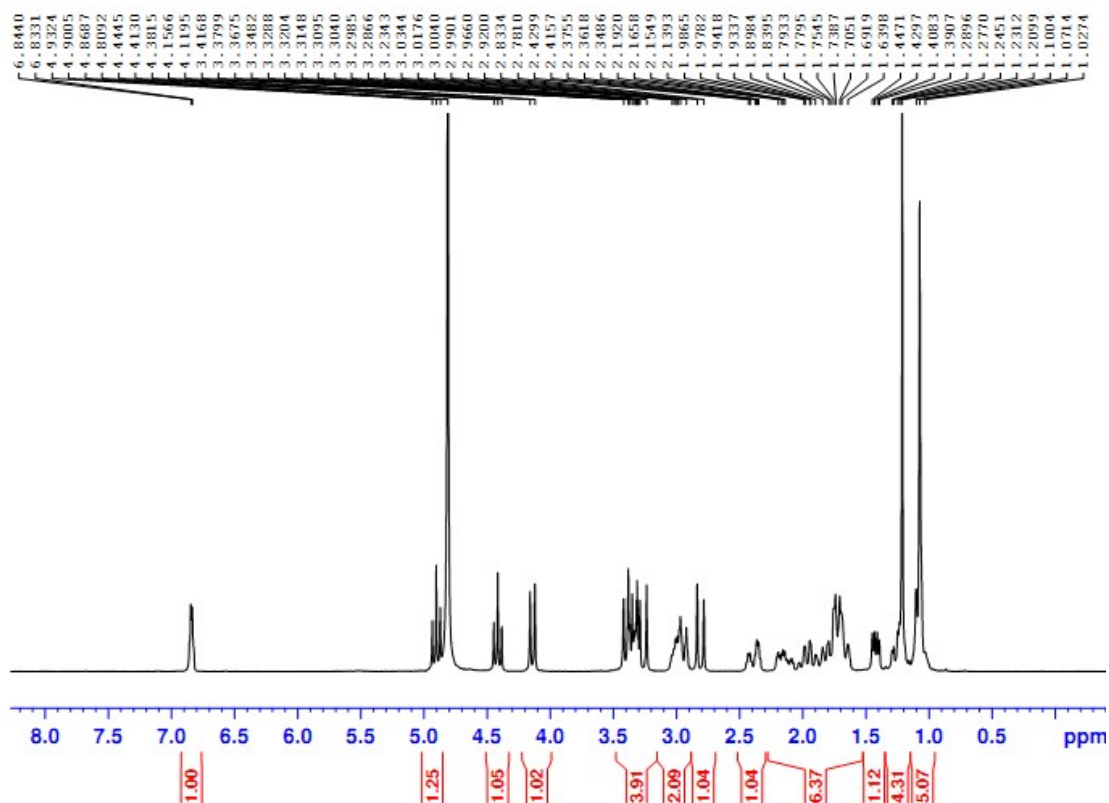

S2. <sup>13</sup>C NMR spectrum of compound 1 (75 MHz, CD<sub>3</sub>OD)

AP-8 <sup>13</sup>C-NMR CD3OD 300K AV-300

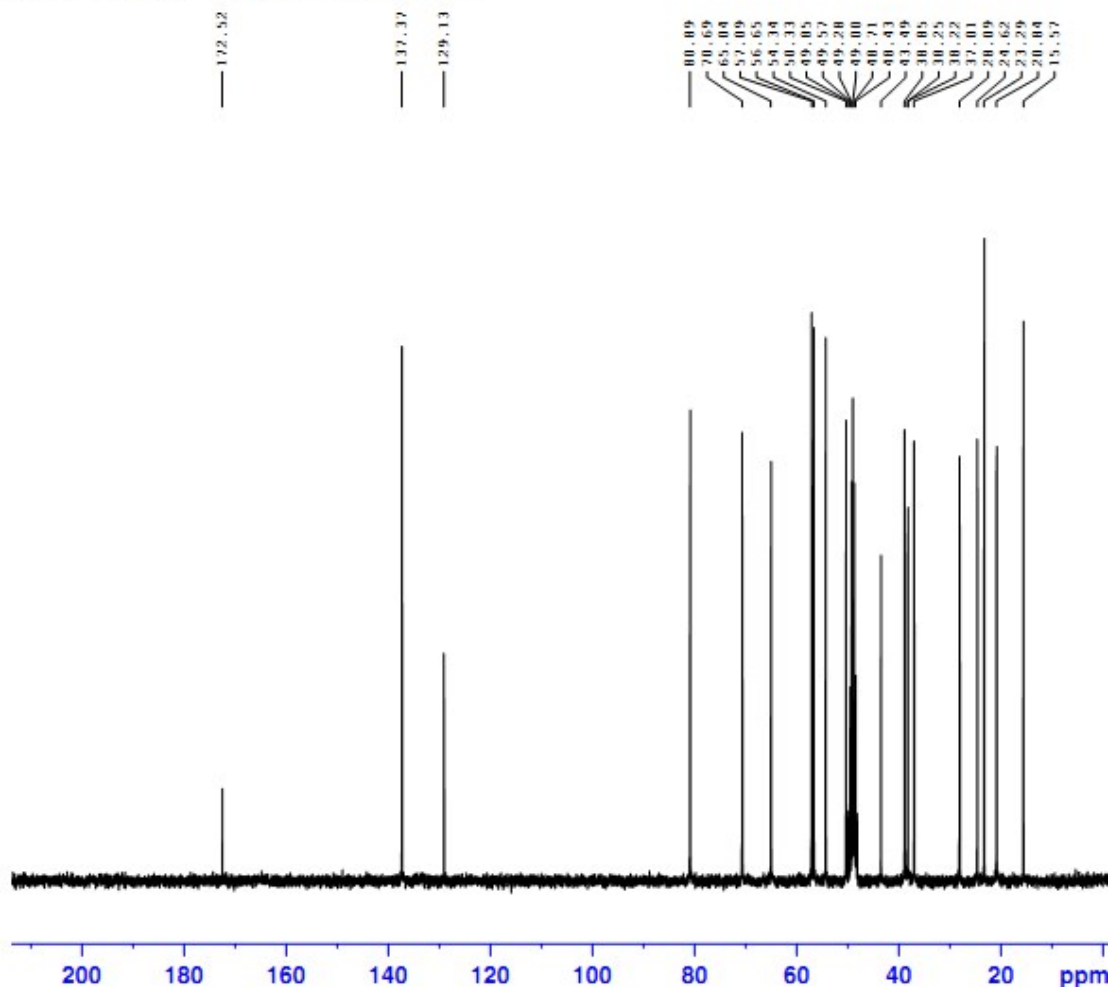

S3.  $^1\text{H}$ - $^1\text{H}$  COSY spectrum of compound 1

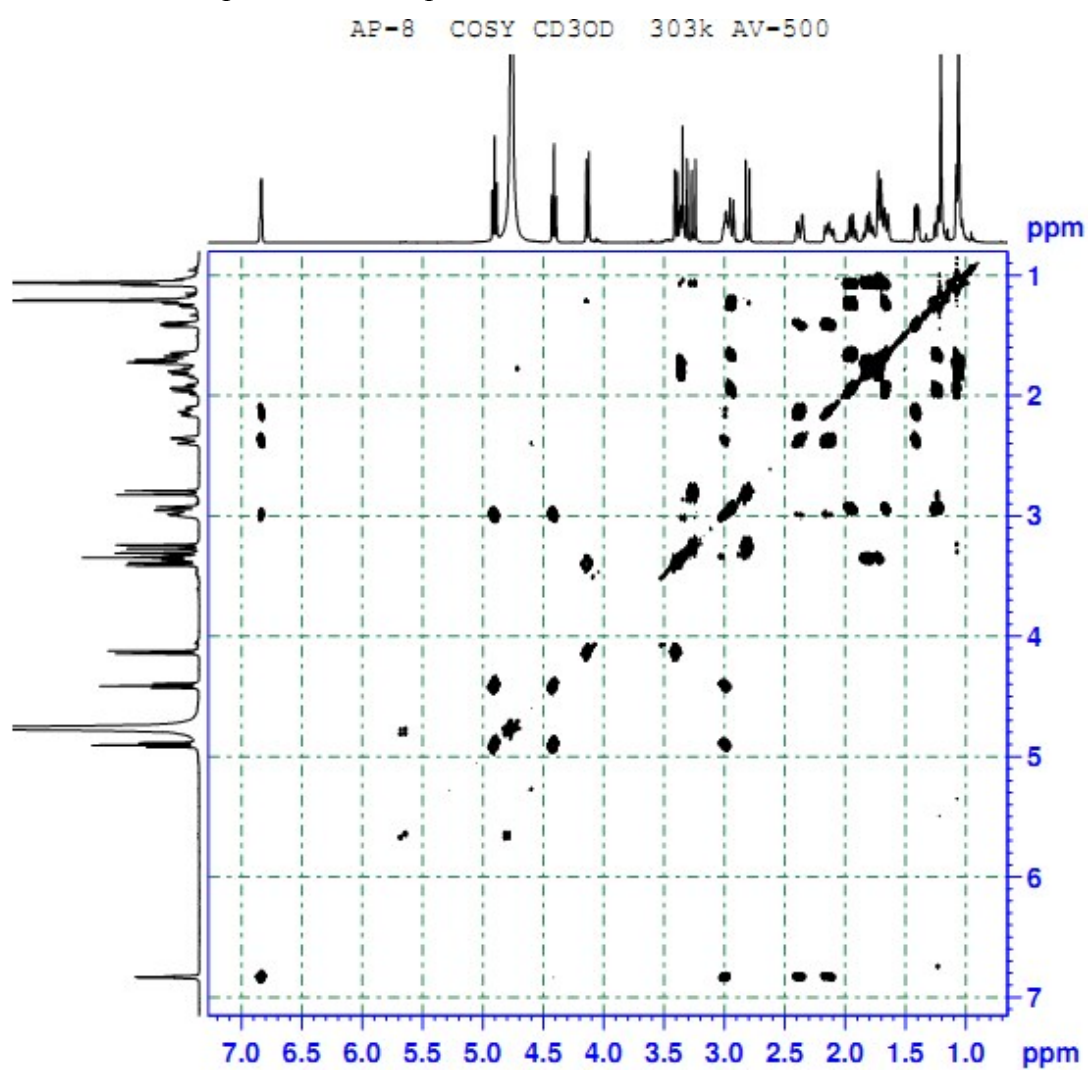

#### S4. HSQC spectrum of compound 1

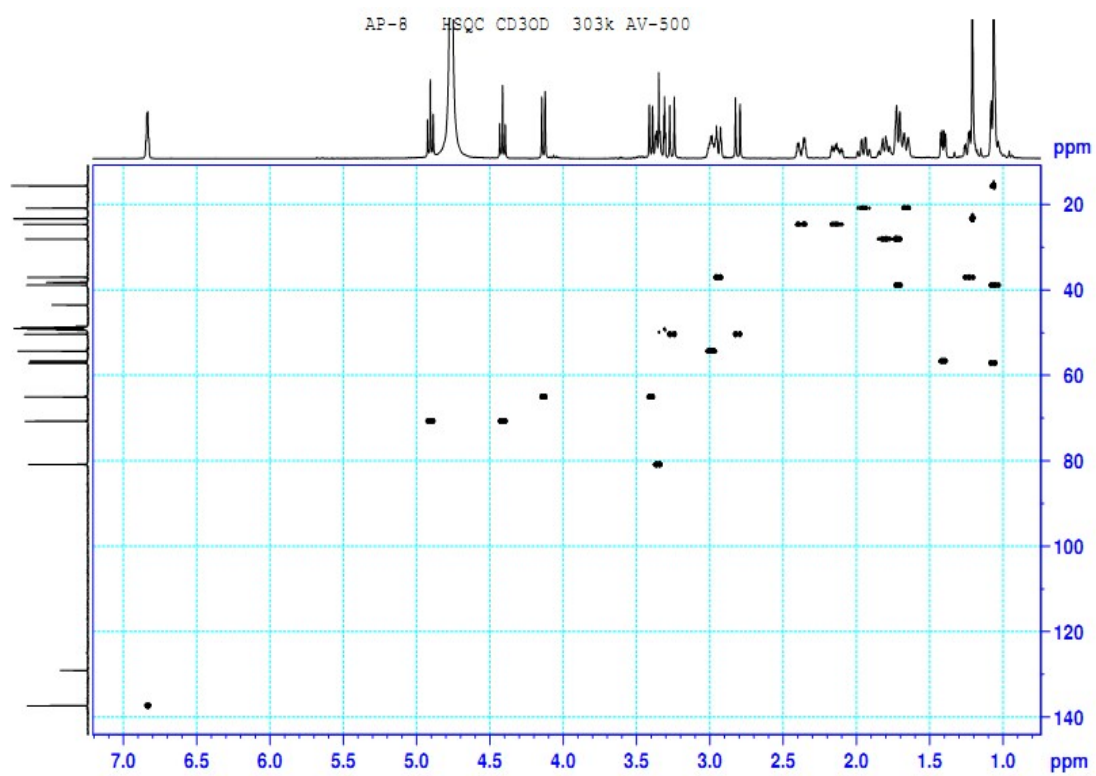

# S5.HMBC spectrum of compound 1

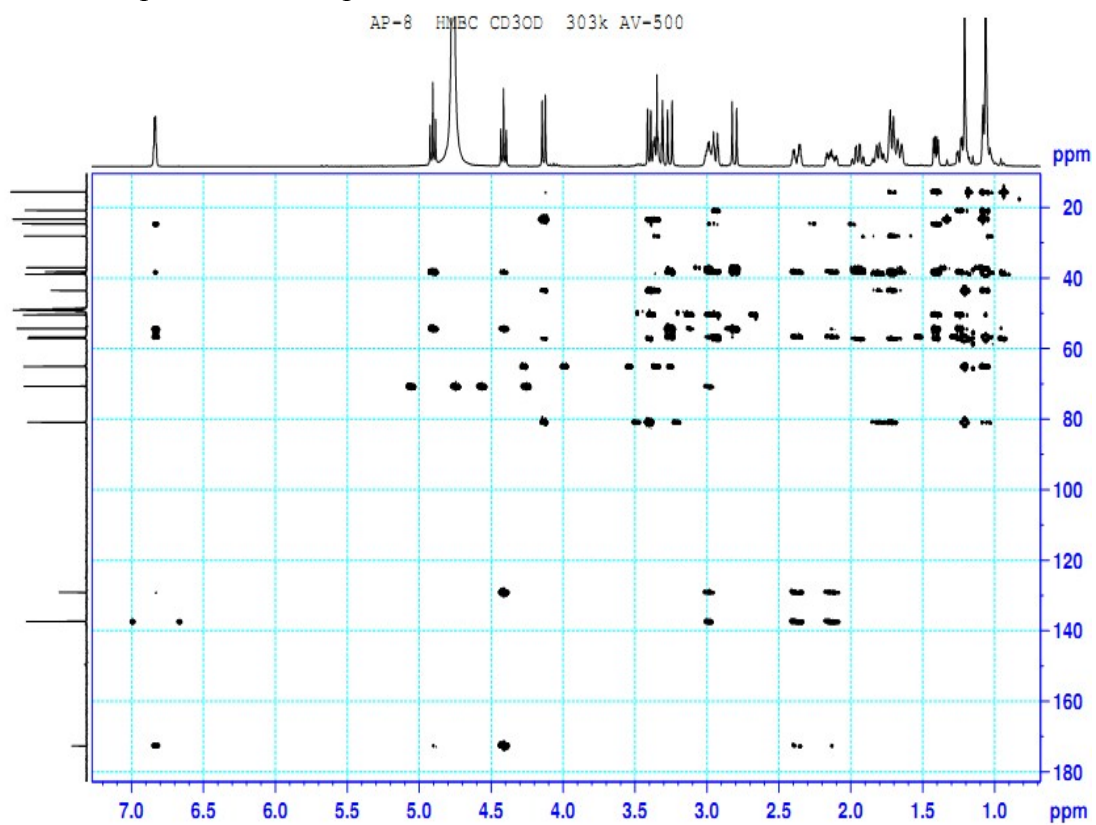

S6. ROESY spectrum of compound 1

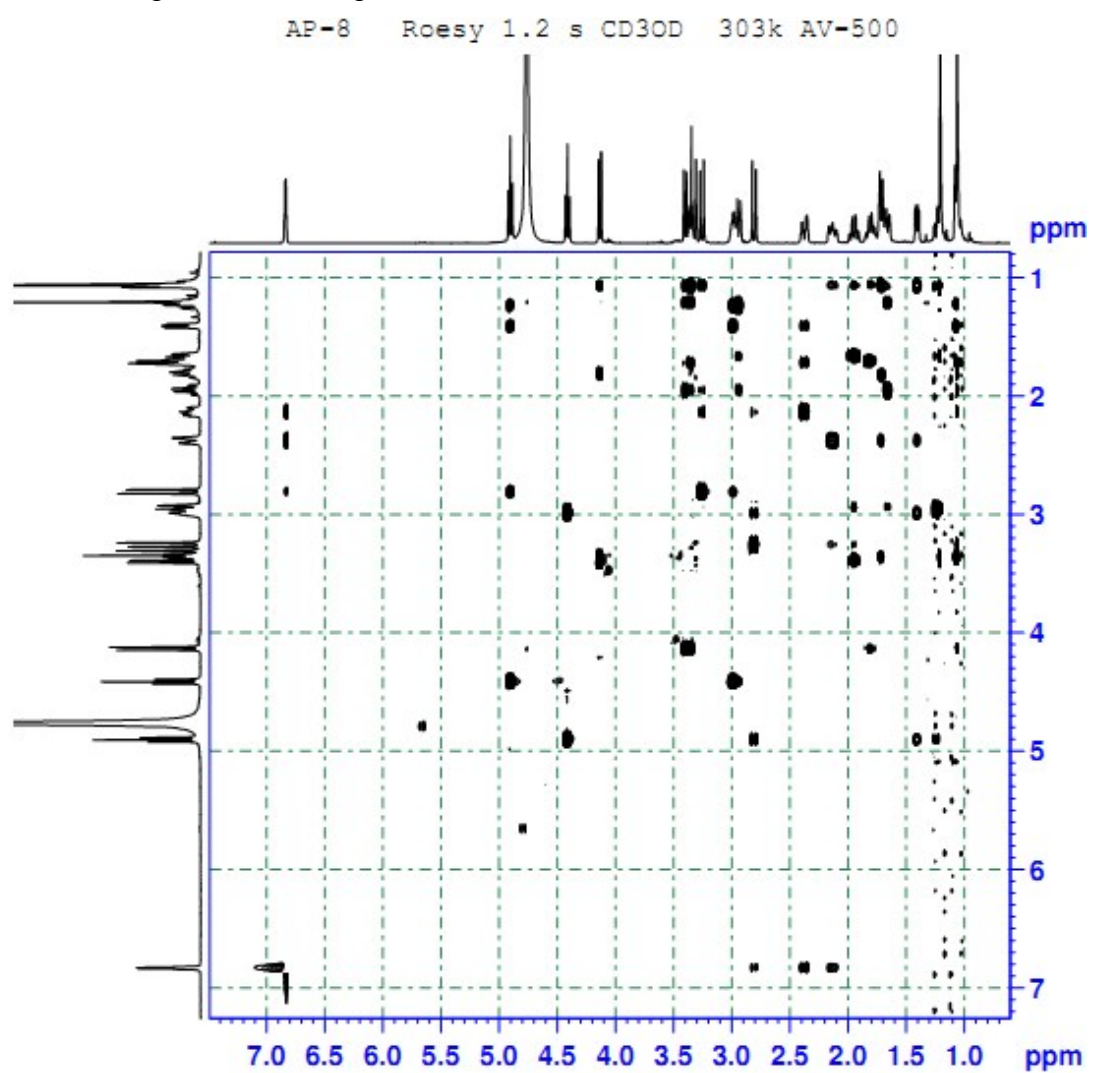



## S7. HRESIMS spectrum of compound 1

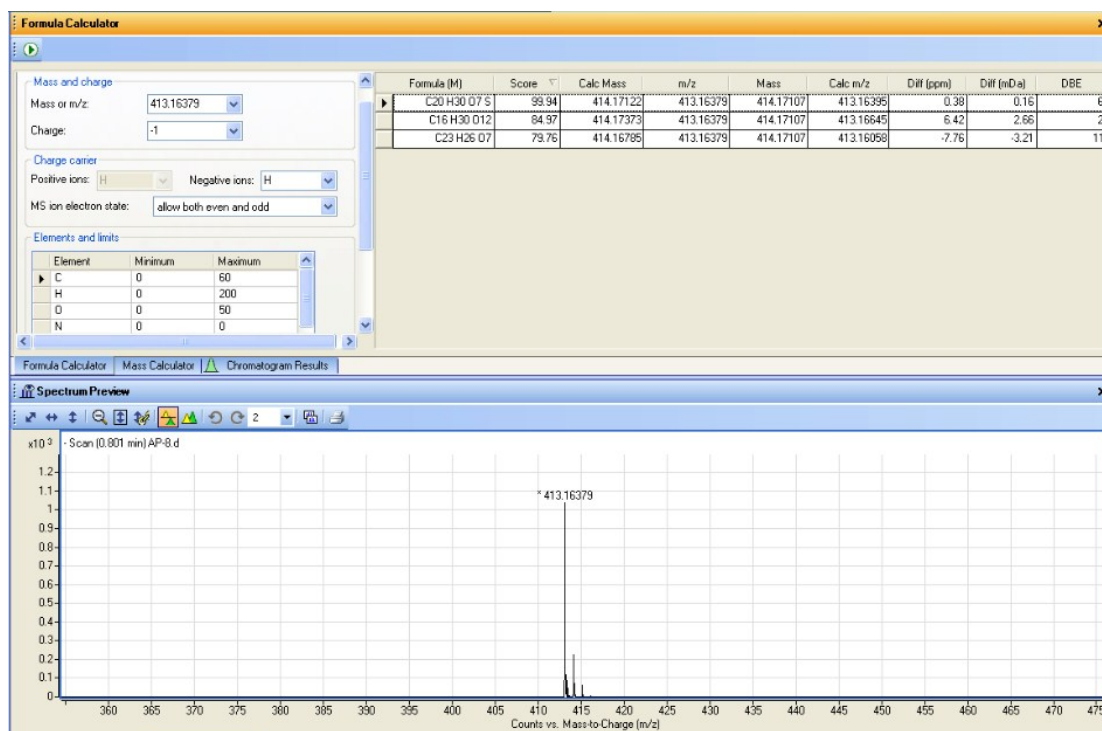

## S8. IR spectrum of compound 1

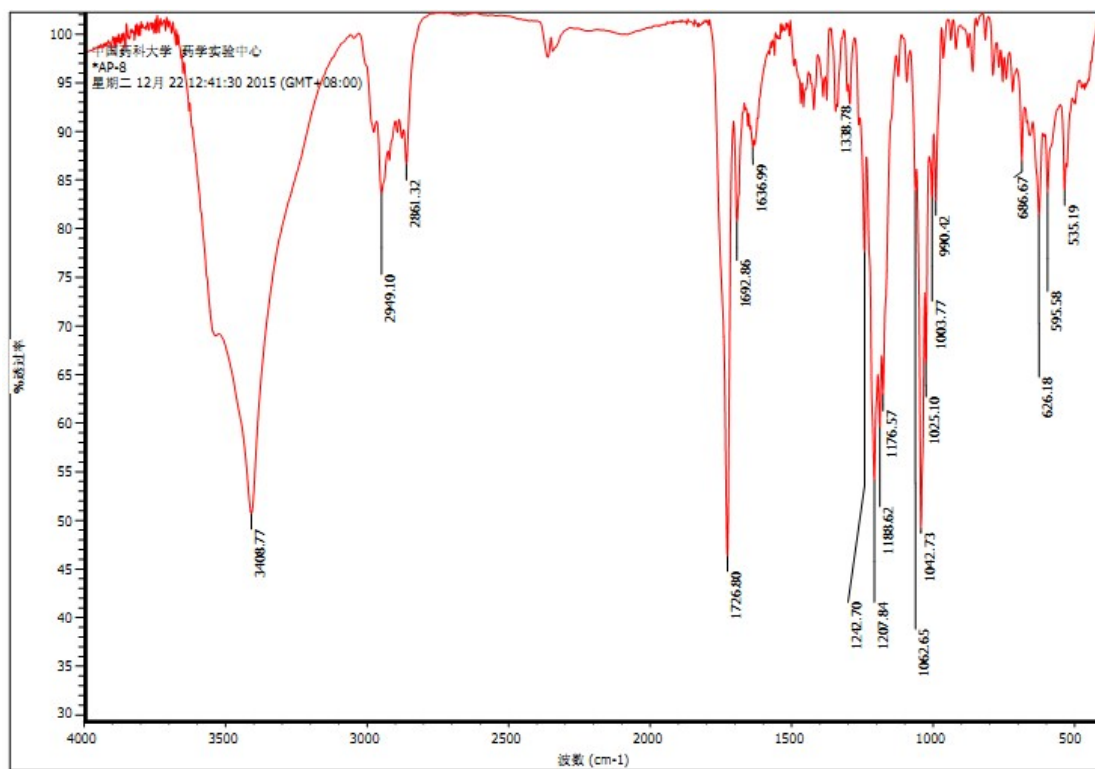

## S9. UV spectrum of compound 1 (MeOH)

Data Set: ap-8 - RawData

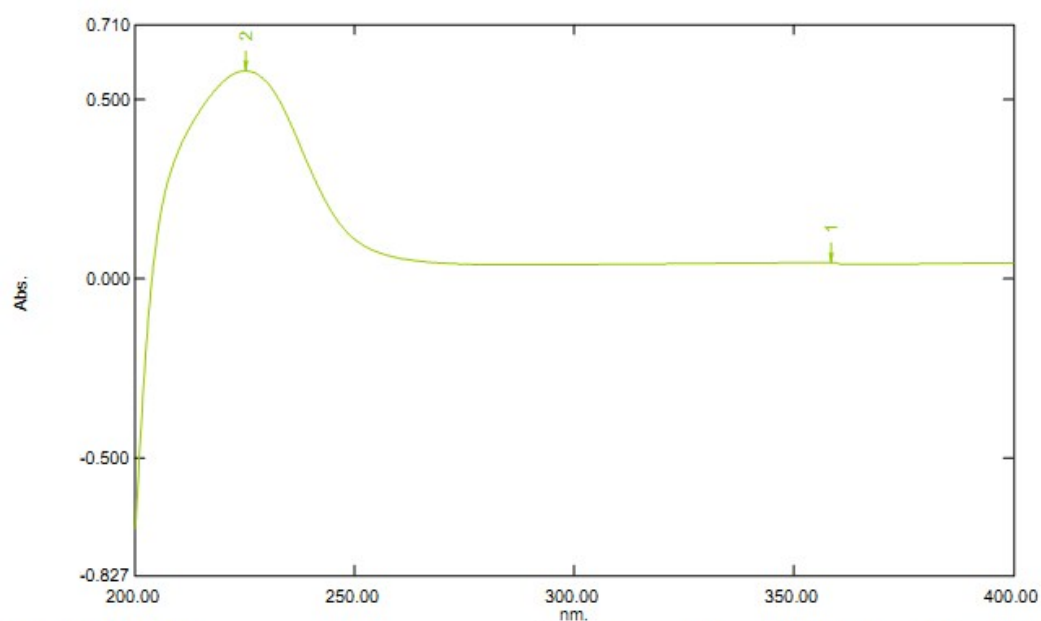

Measurement Properties  
Wavelength Range (nm.): 200.00 to 400.00  
Scan Speed: Fast  
Sampling Interval: 0.2

| No. | P/V | Wavelength | Abs.  | Description |
|-----|-----|------------|-------|-------------|
| 1   | Ⓢ   | 358.60     | 0.046 |             |
| 2   | Ⓢ   | 225.20     | 0.582 |             |

S10. <sup>1</sup>H NMR spectrum of compound 2 (300 MHz, DMSO-d<sub>6</sub>)

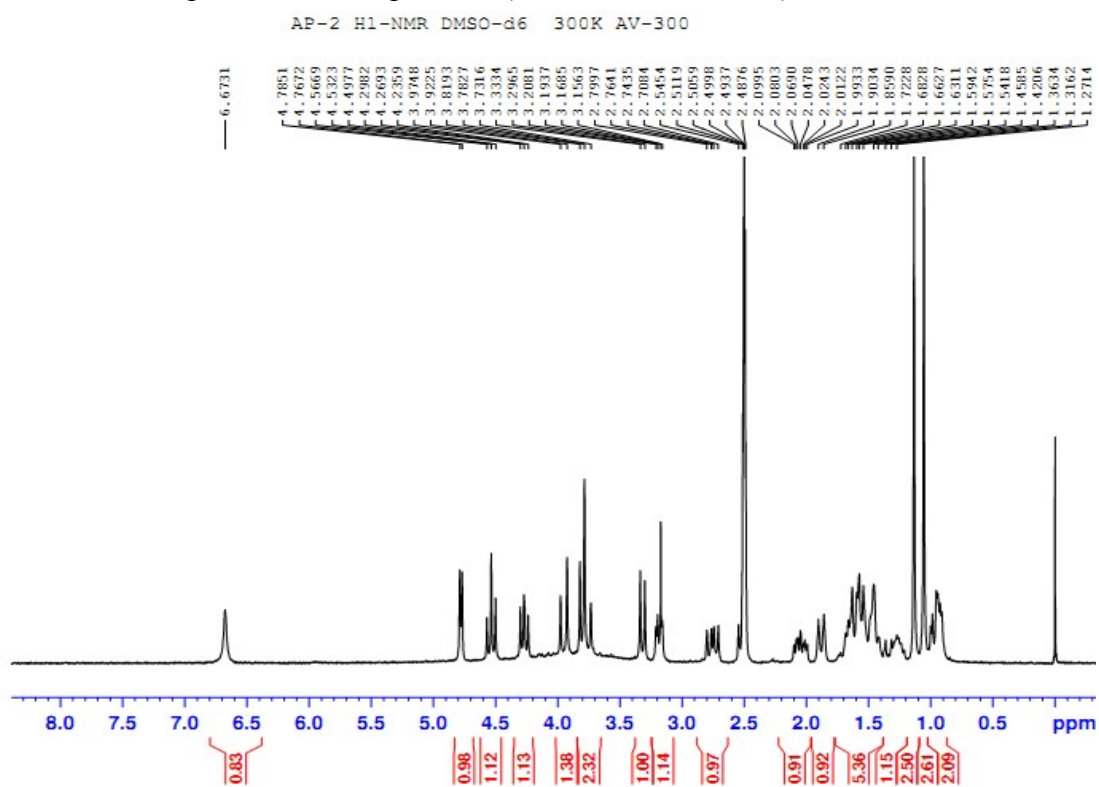

S11. <sup>13</sup>C NMR spectrum of compound 2 (75 MHz, DMSO-d<sub>6</sub>)

AP-2 13C-NMR DMSO-d6 300K AV-300

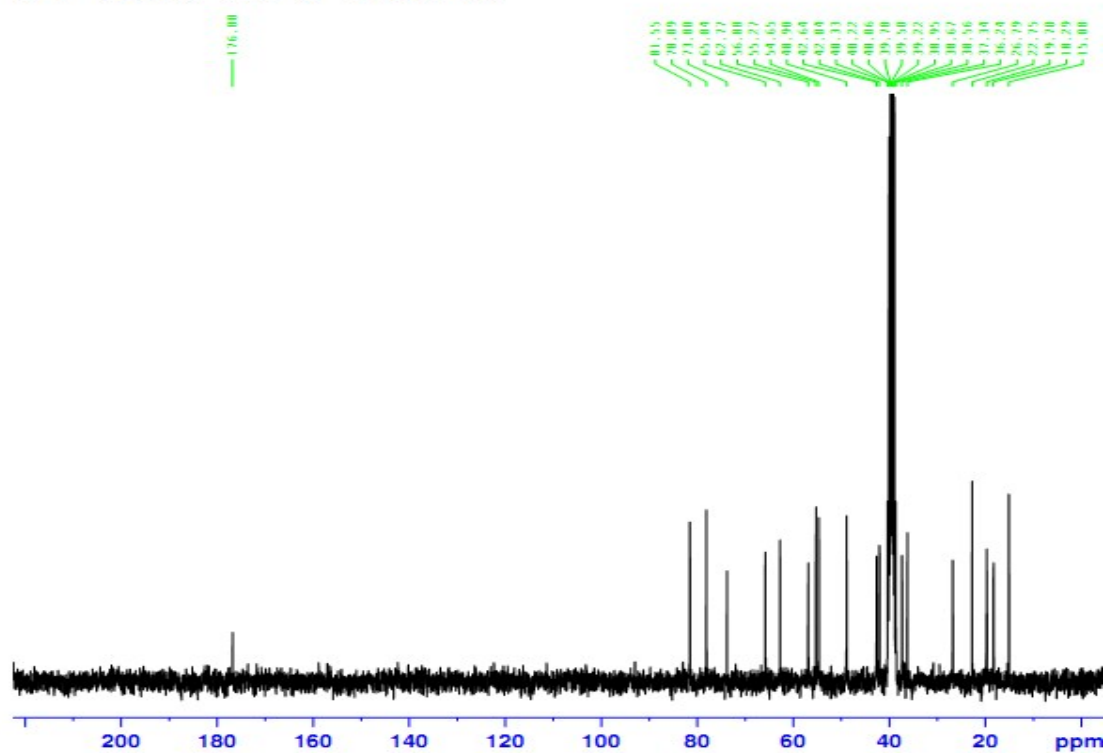

S12.  $^1\text{H}$ - $^1\text{H}$  COSY spectrum of compound 2

AP-2 COSY DMSO-d6 300K AV-300

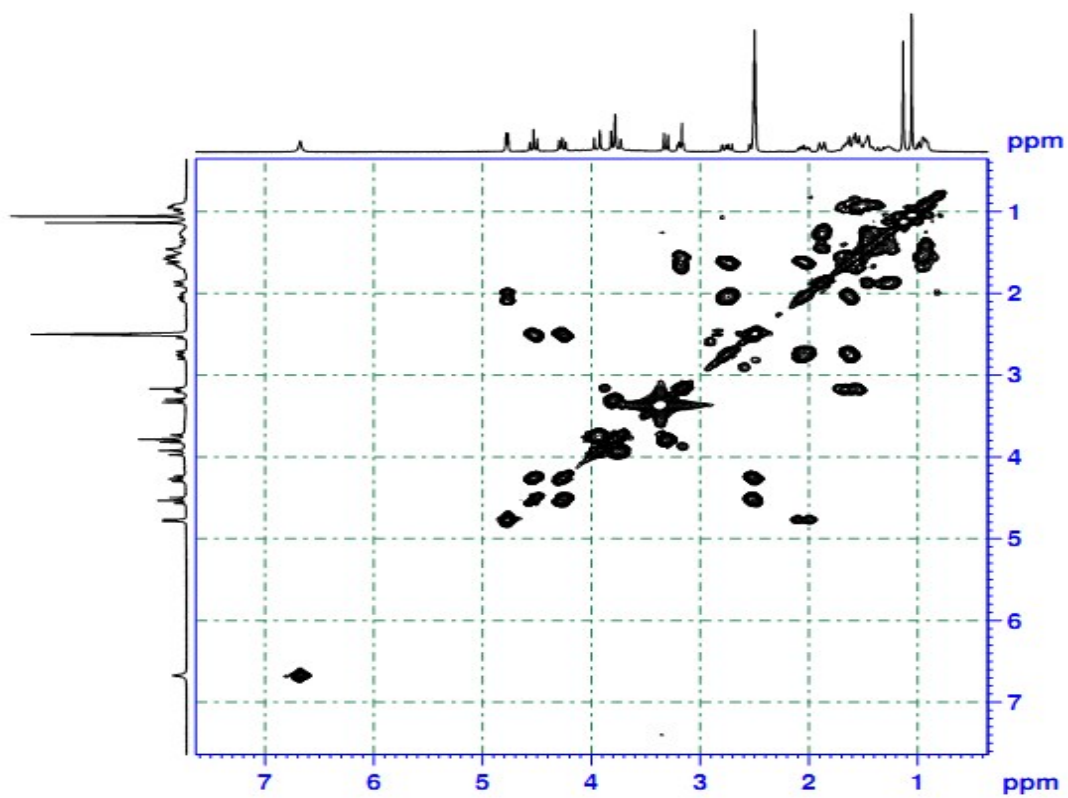

### S13. HSQC spectrum of compound 2

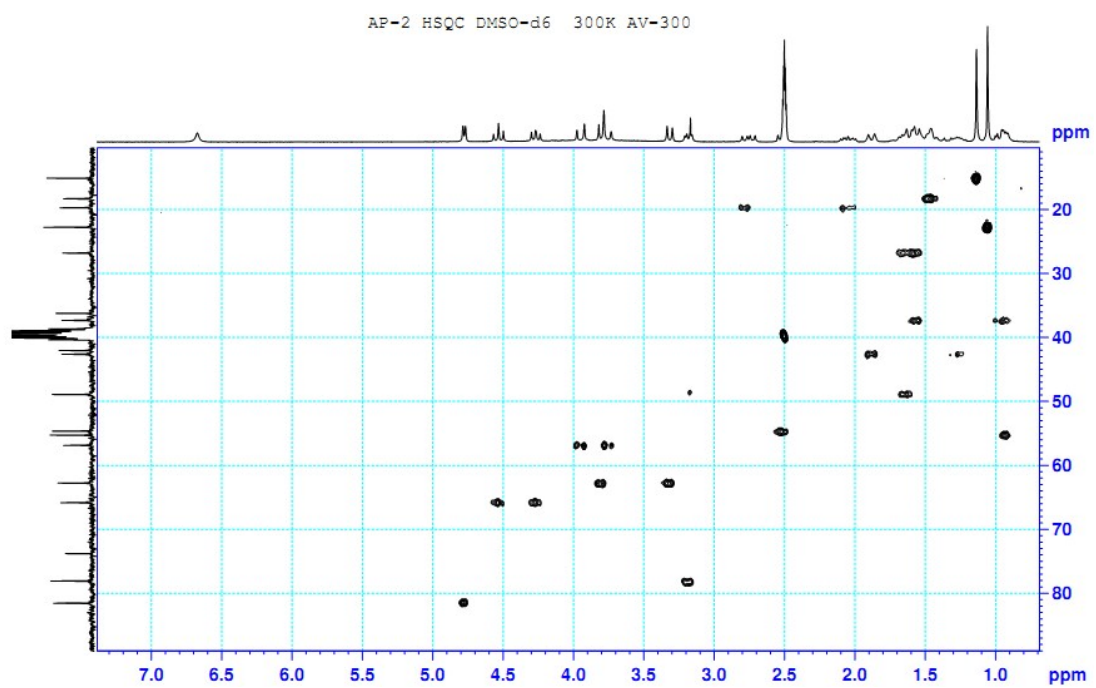

# S14.HMBC spectrum of compound 2

AP-2 HMBC DMSO-d6 300K AV-300

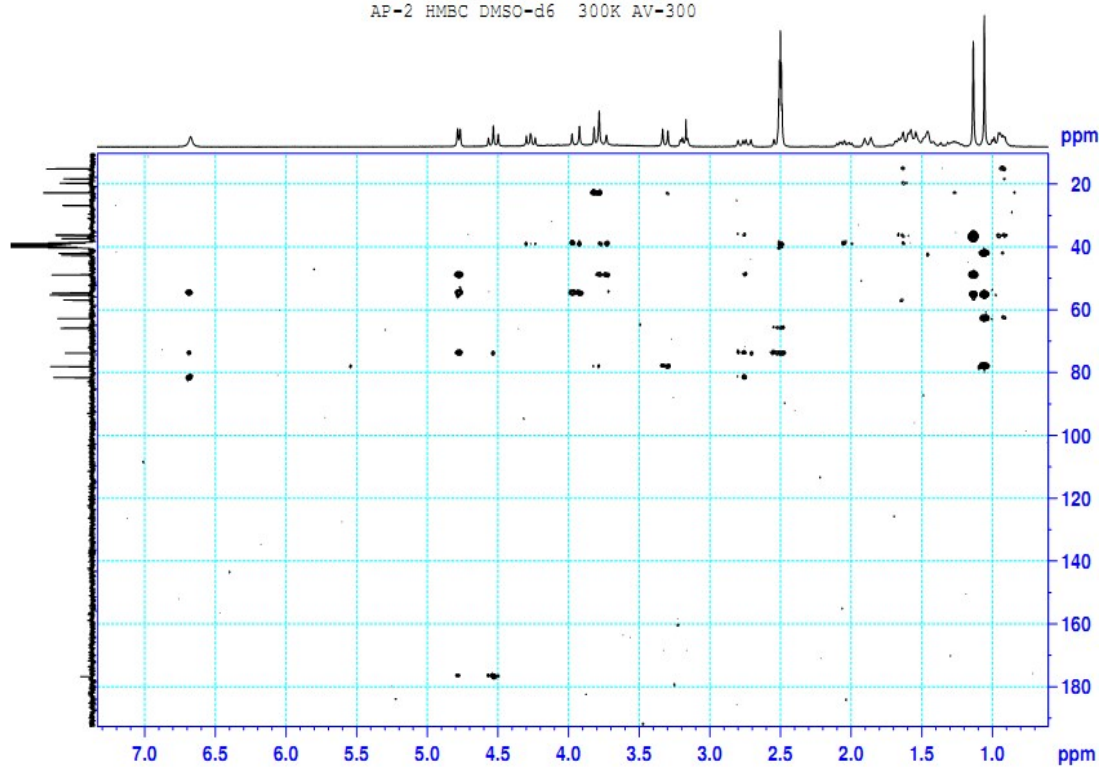



S15. ROESY spectrum of compound 2

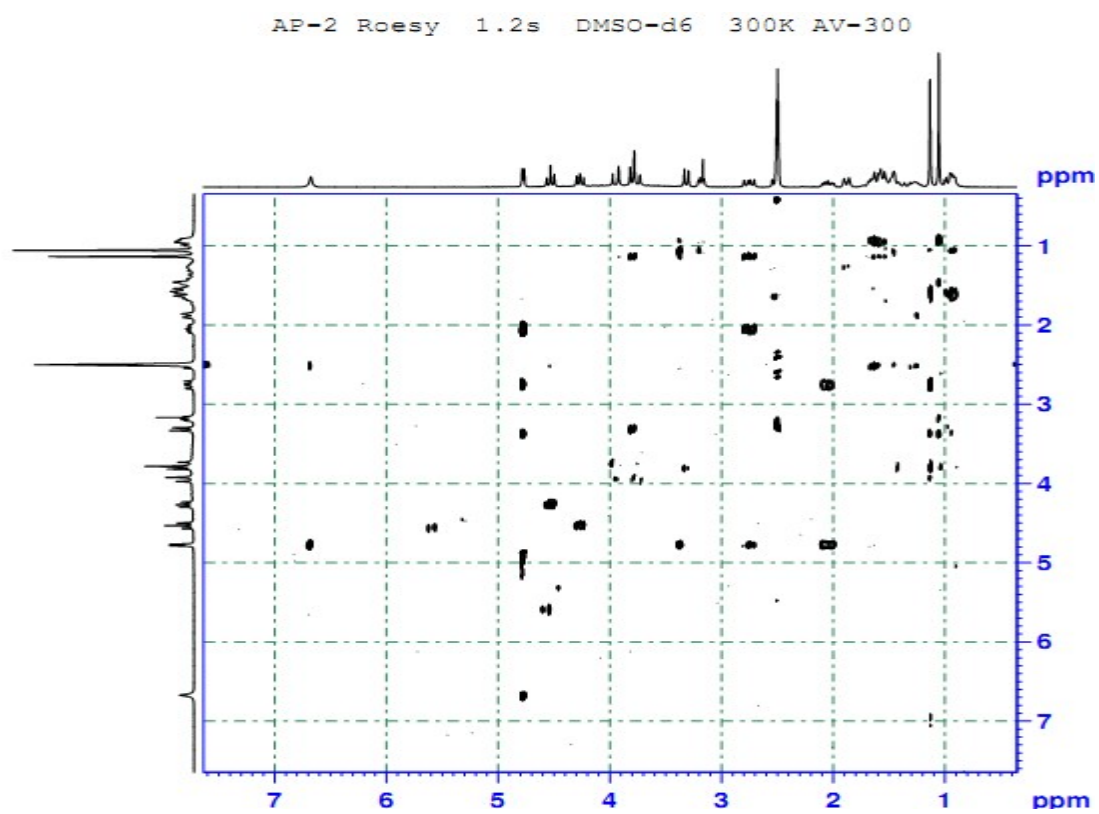

## S16. HRESIMS spectrum of compound 2

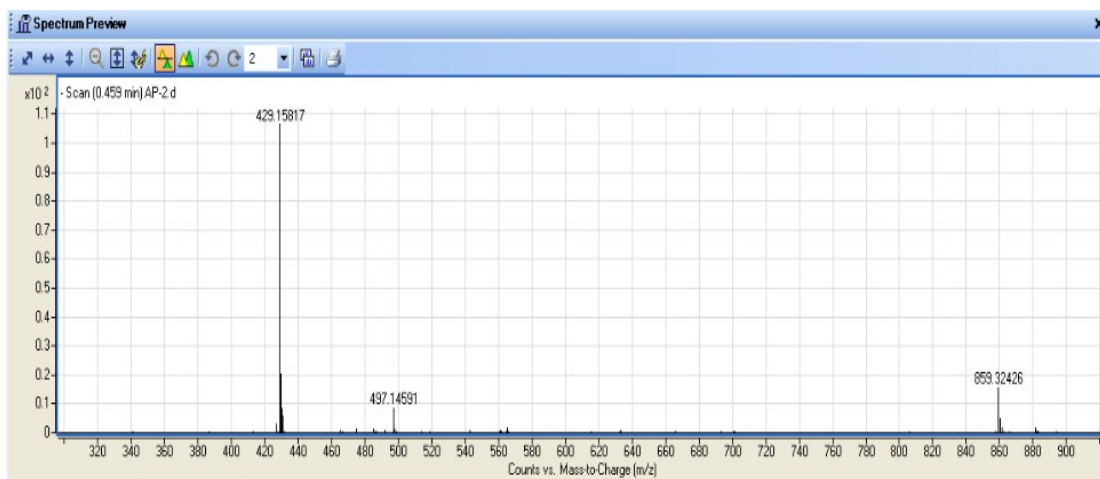

## S17. IR spectrum of compound 2

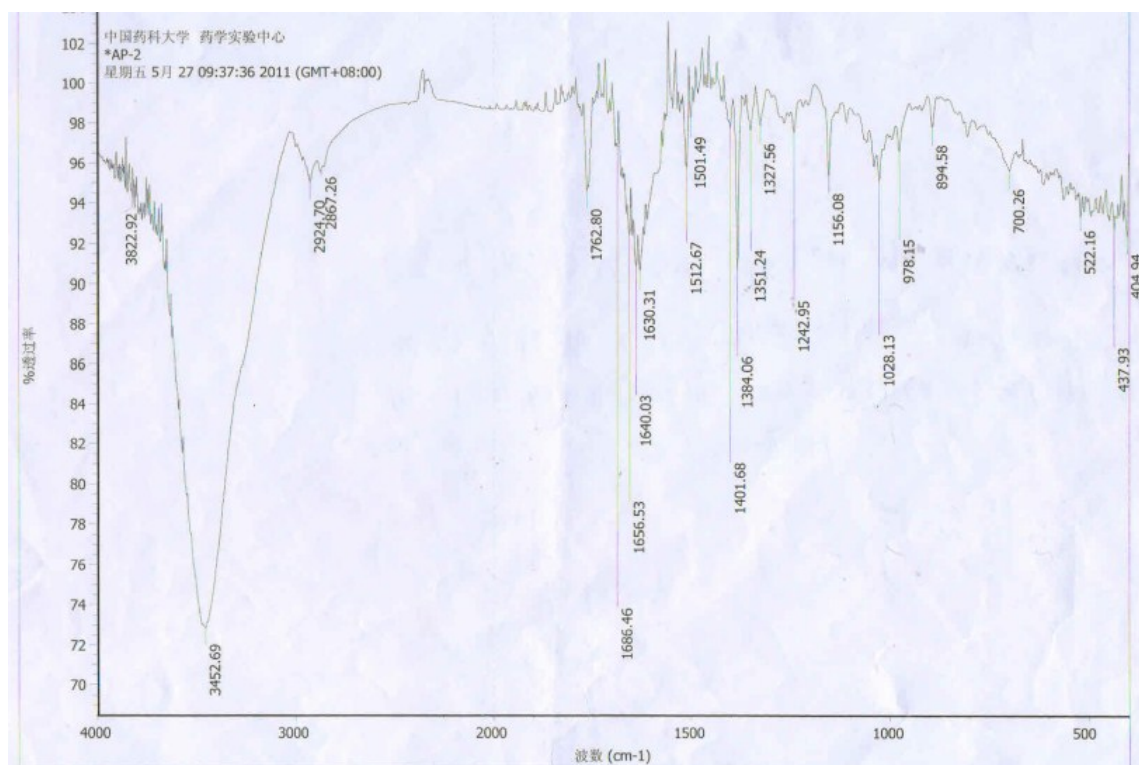

S18. Mo<sub>2</sub>(OAc)<sub>4</sub>-induced circular dichroism (ICD) spectrum of compound 2

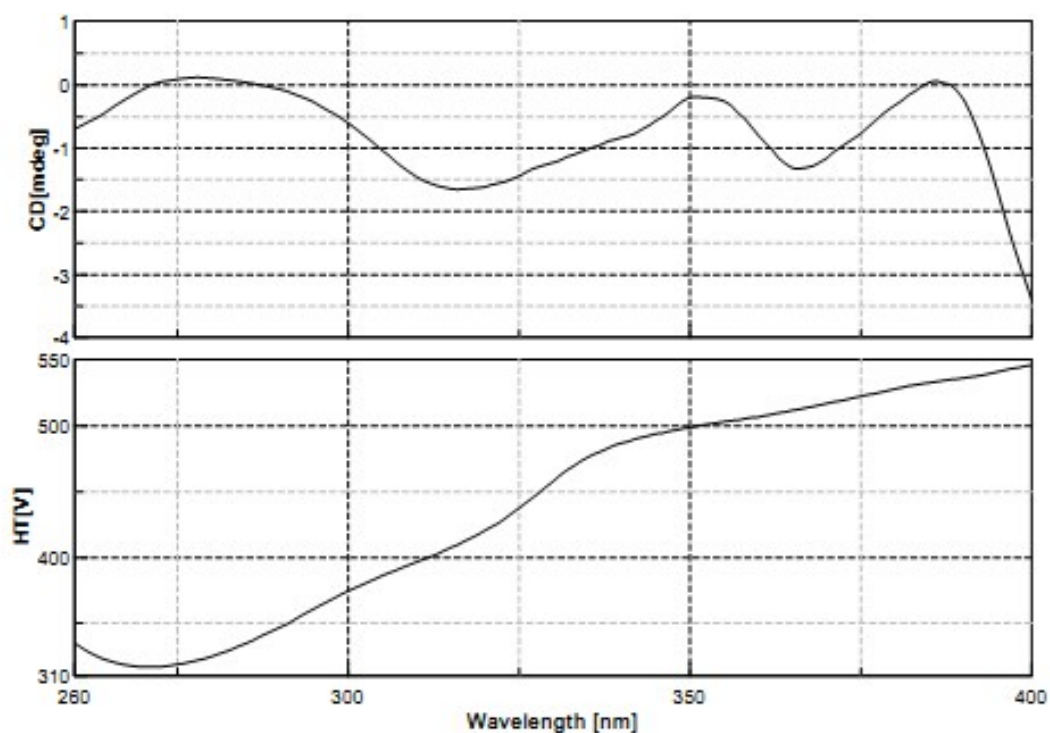

|                   |                  |
|-------------------|------------------|
| Date              | 2015/3/11 14:47  |
| File name         | AP-2+Mo.jws      |
| Model             | J-810            |
| Serial No.        | B050560750       |
| Band width        | 1 nm             |
| Response          | 1 sec            |
| Sensitivity       | Standard         |
| Measurement range | 400 - 260 nm     |
| Data pitch        | 1nm              |
| Scanning speed    | 50 nm/min        |
| Accumulation      | 1                |
| Cell Length       | 0.1 cm           |
| Solvent           | DMSO             |
| Temperature       | Room Temperature |
| Sample name       | AP-2+Mo          |
| Operator          | DEMO             |

S19. <sup>1</sup>H NMR spectrum of compound 3 (300 MHz, CD<sub>3</sub>OD)

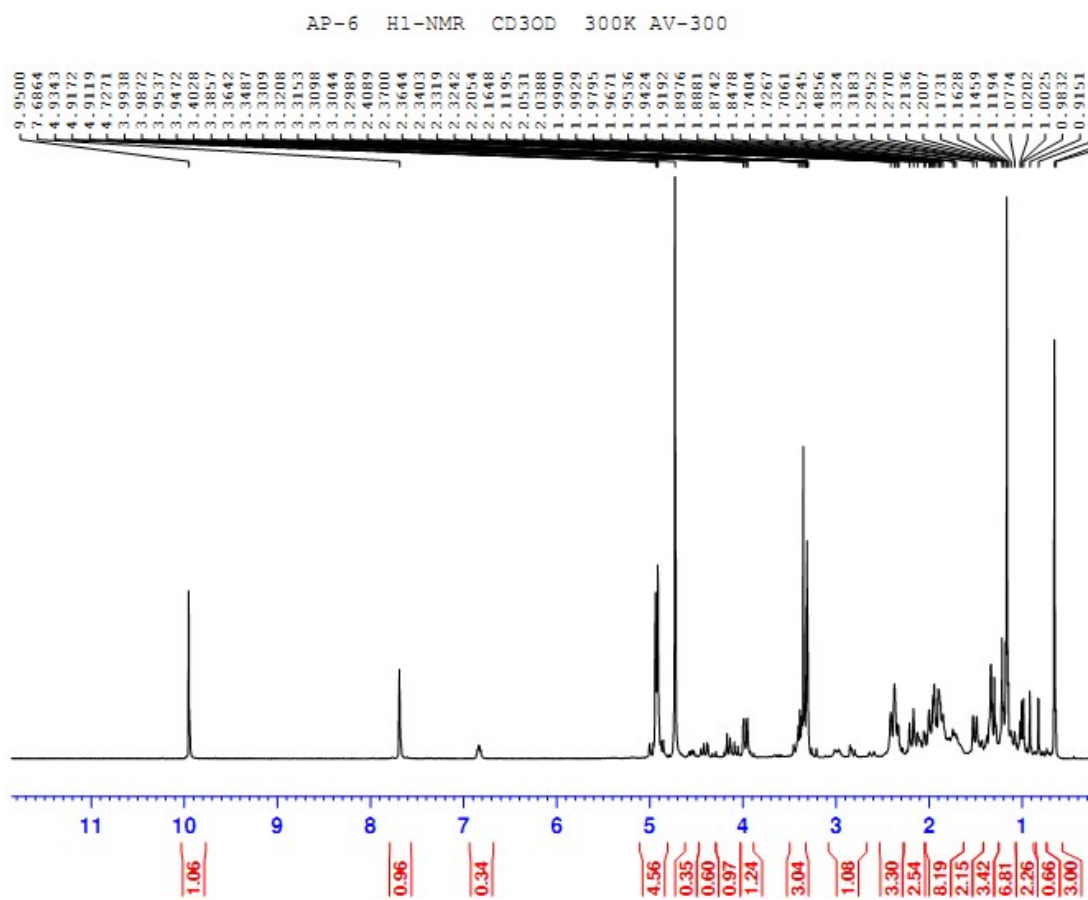

S20.  $^{13}\text{C}$  NMR spectrum of compound **3** (75 MHz,  $\text{CD}_3\text{OD}$ )

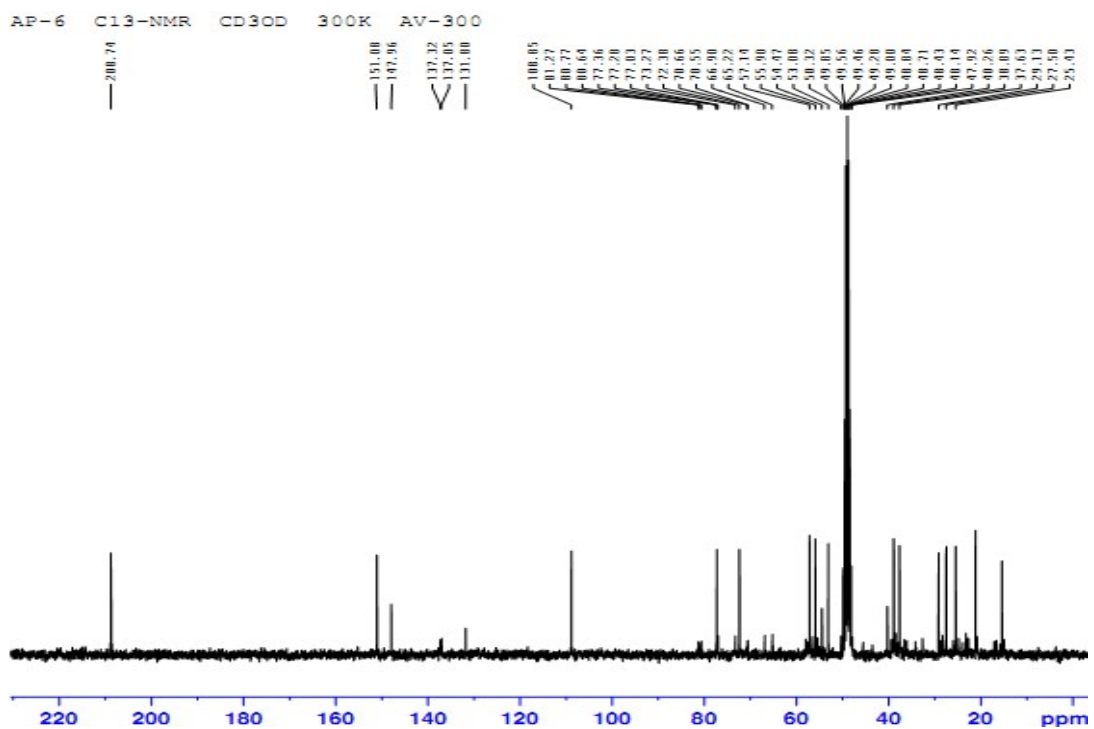

S21.  $^1\text{H}$ - $^1\text{H}$  COSY spectrum of compound 3

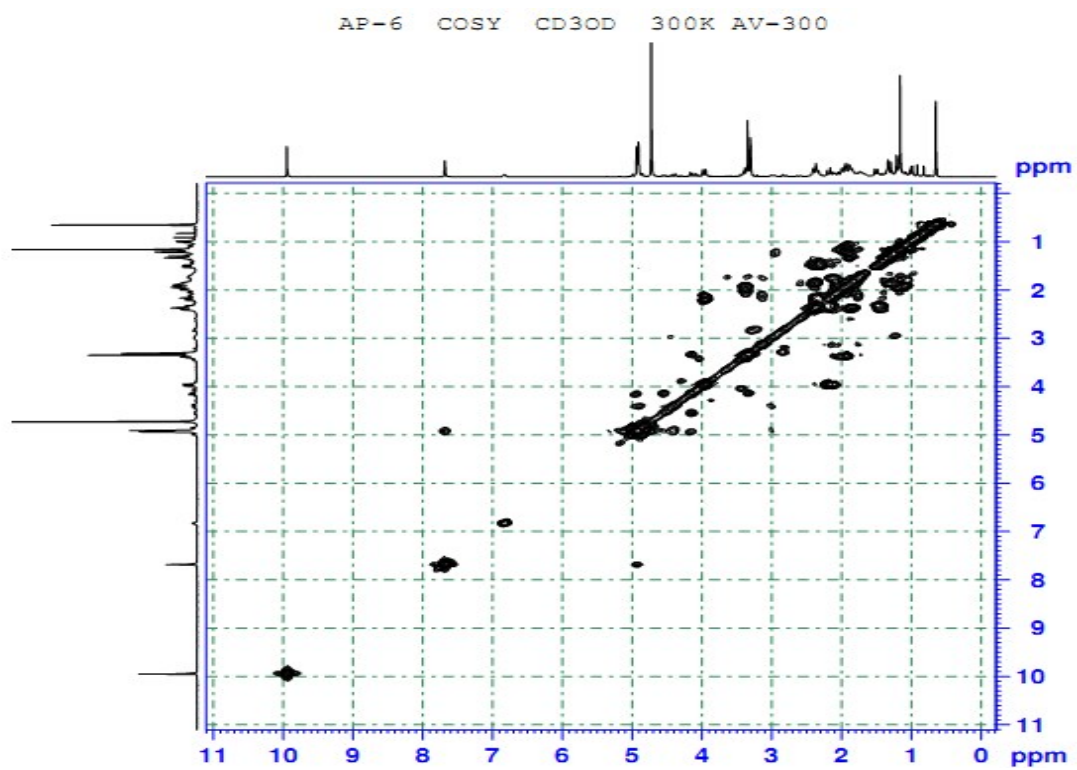

S22. HSQC spectrum of compound 3

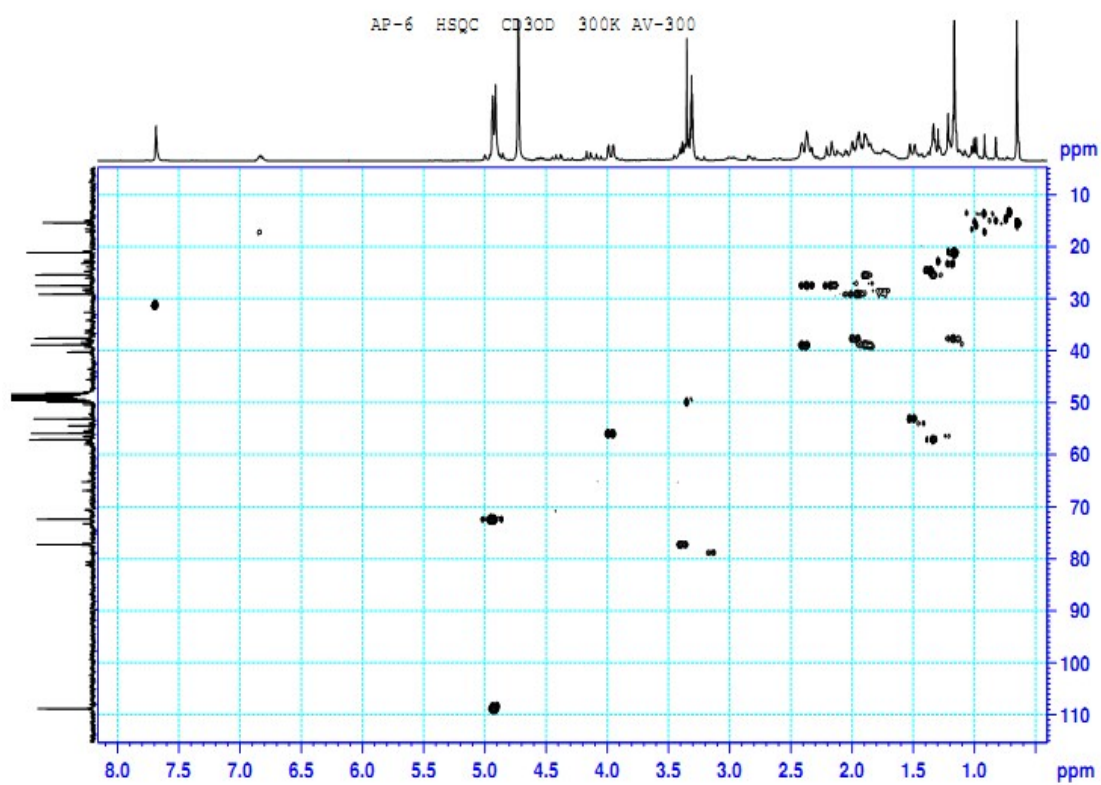



S23.HMBC spectrum of compound 3

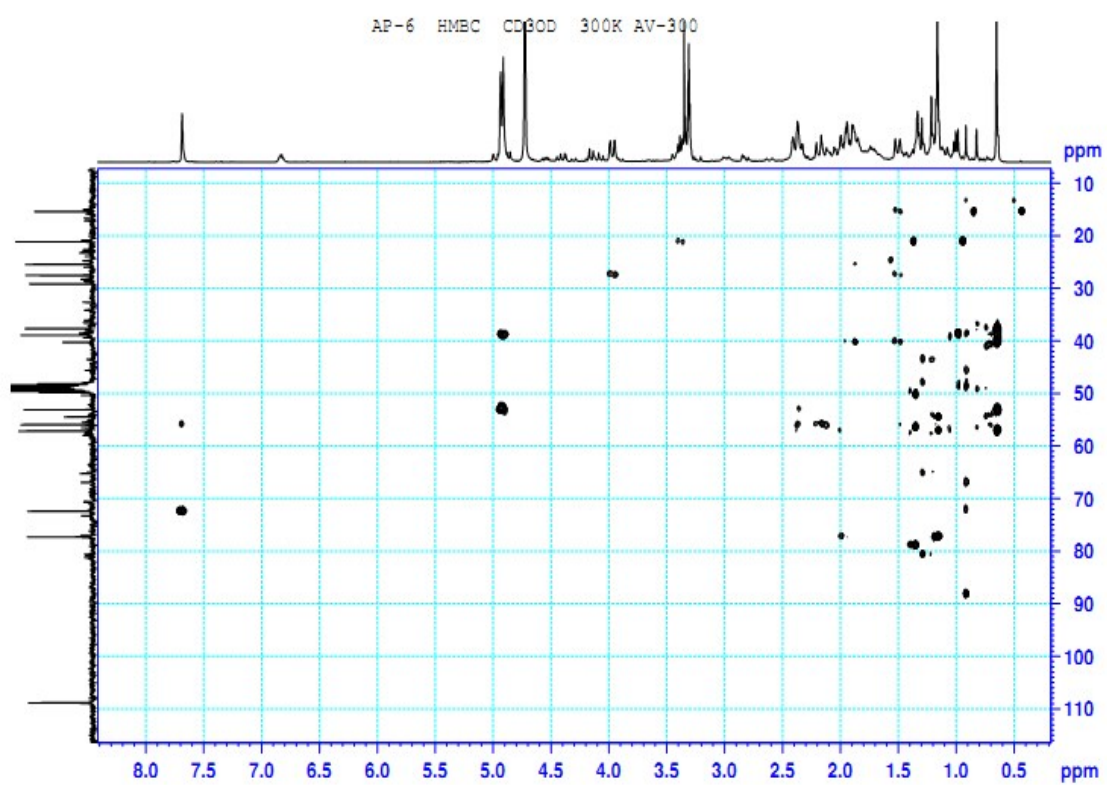

S24. ROESY spectrum of compound 3

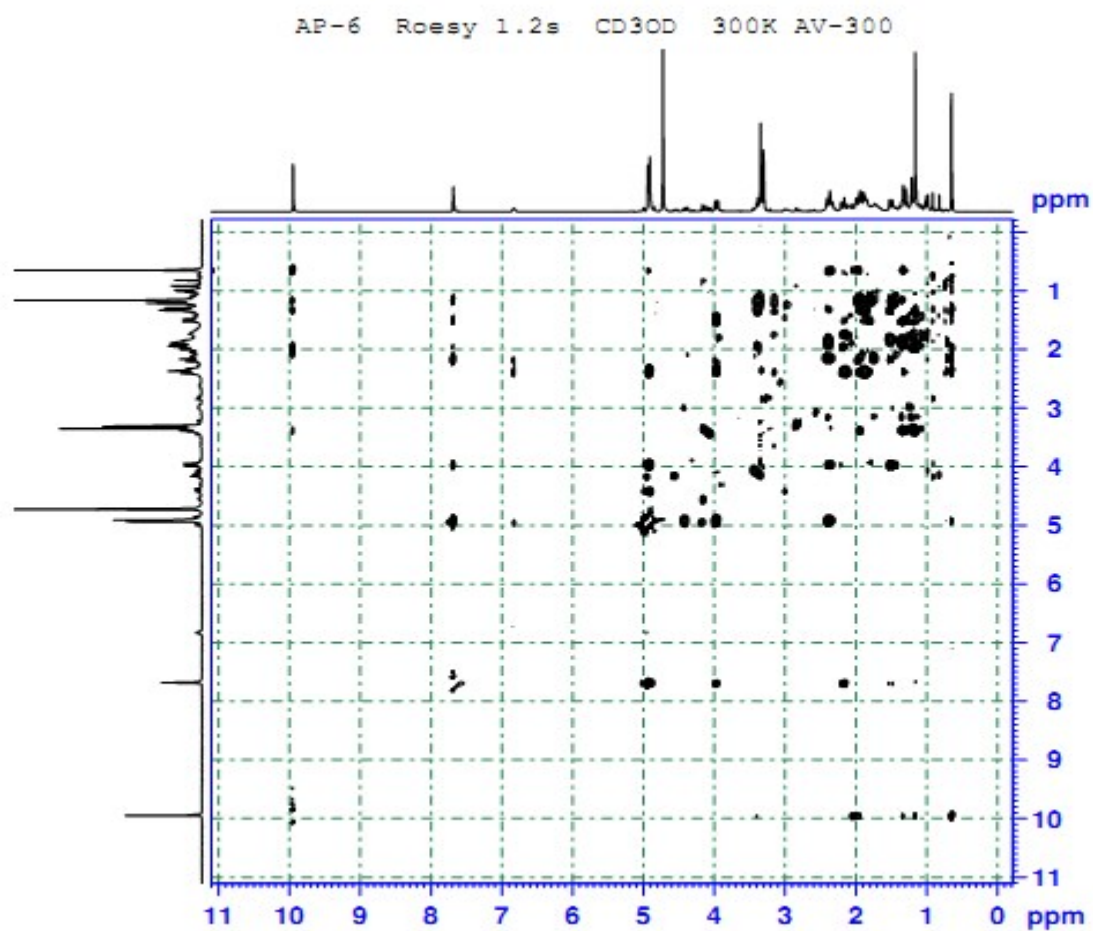

## S25. HRESIMS spectrum of compound 3

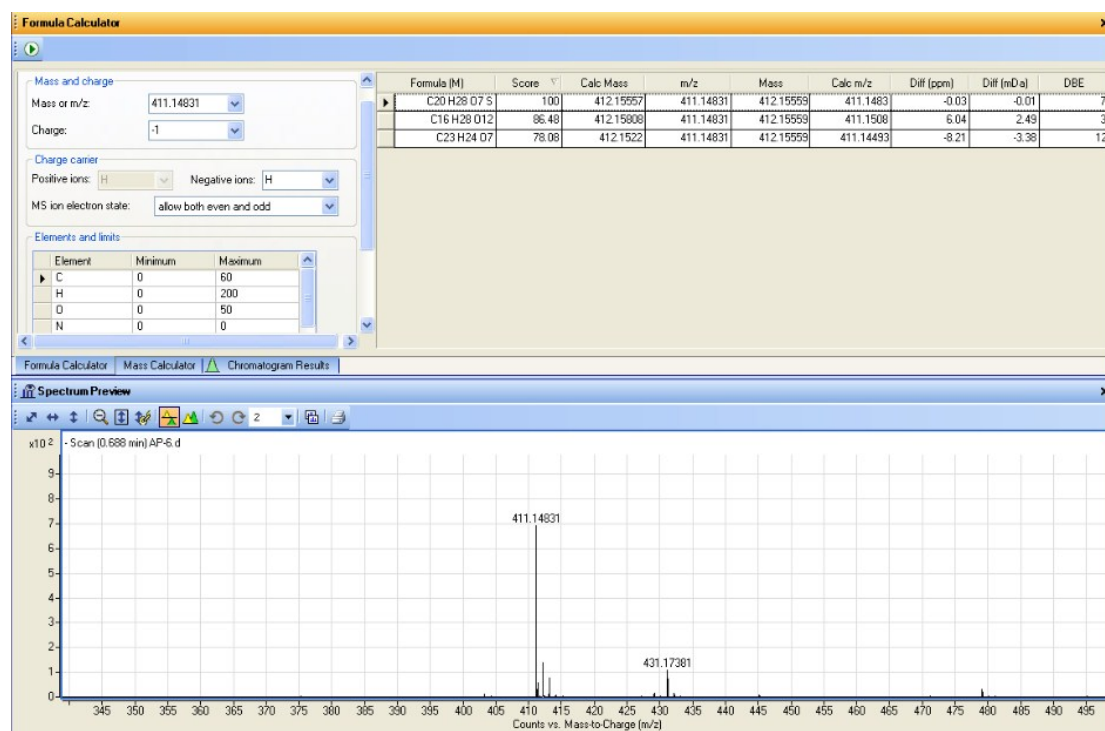

### S26. IR spectrum of compound 3

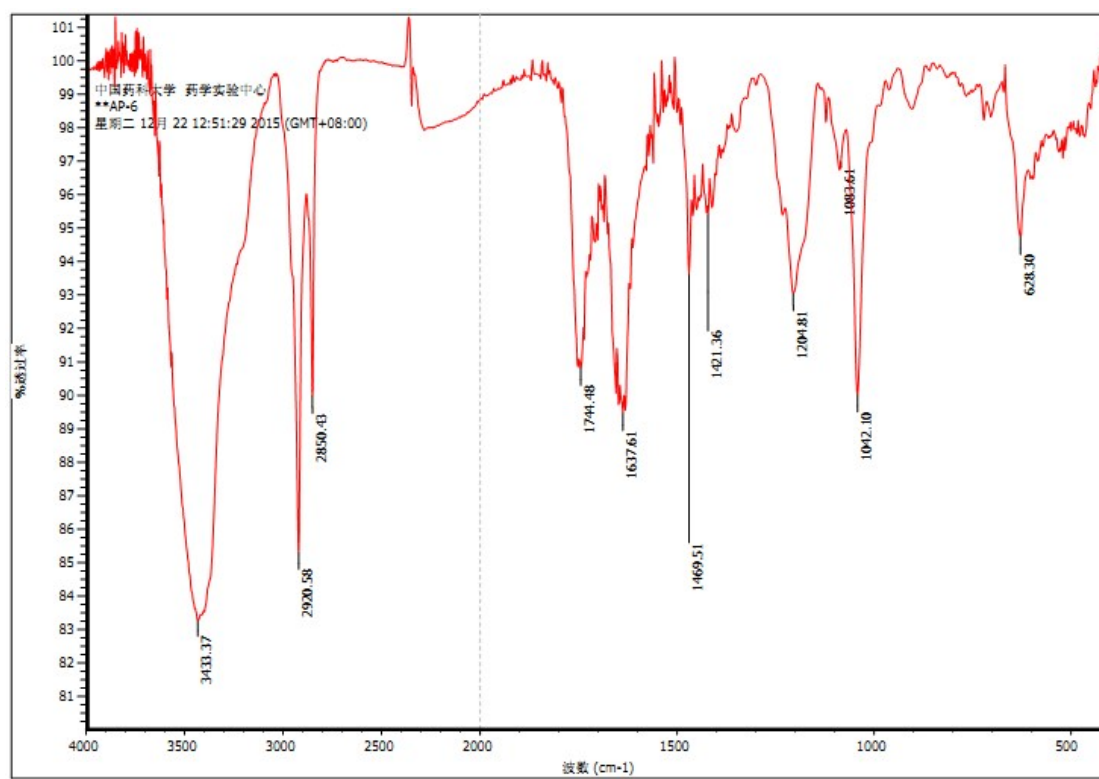

## S27. UV spectrum of compound 3 (MeOH)

Data Set: ap-6 - RawData

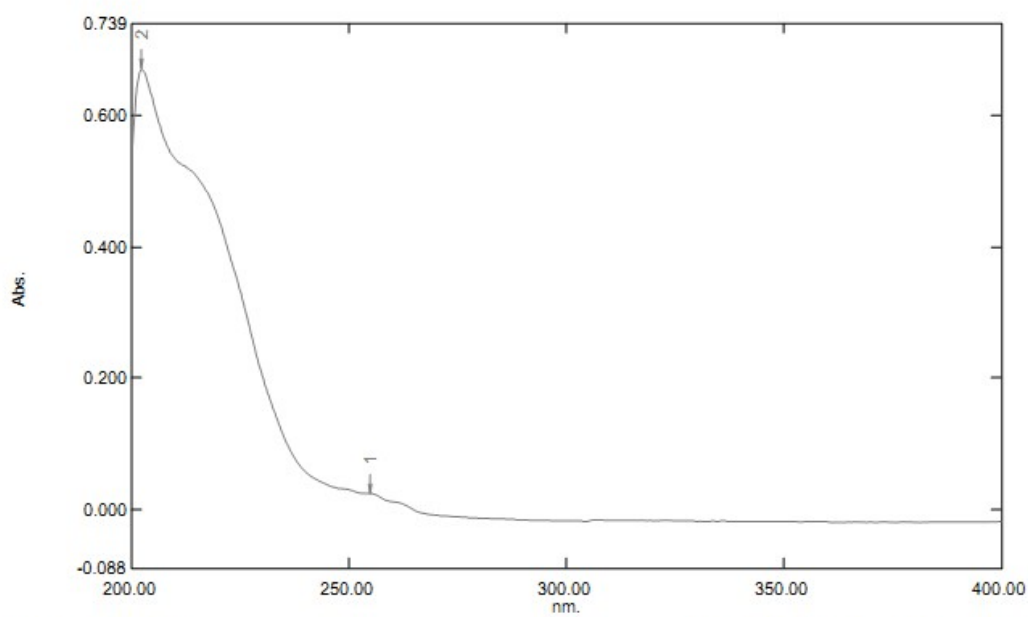

Measurement Properties  
Wavelength Range (nm.): 200.00 to 400.00  
Scan Speed: Fast  
Sampling Interval: 0.2  
Auto Sampling Interval: Disabled  
Scan Mode: Auto

| No. | P/V | Wavelength | Abs.   | Description |
|-----|-----|------------|--------|-------------|
| 1   | ⊕   | 254.80     | 0.025  |             |
| 2   | ⊕   | 202.40     | 0.670  |             |
| 3   | ⊖   | 304.40     | -0.017 |             |
| 4   | ⊖   | 253.60     | 0.025  |             |

### S28. CD spectrum of compound 3 (MeOH)

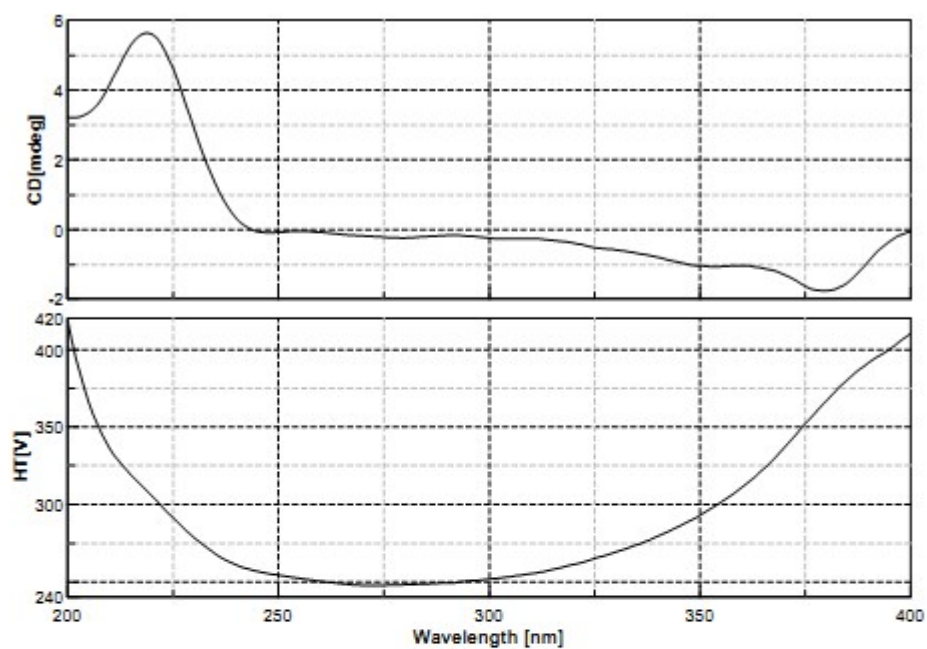

|                   |                  |
|-------------------|------------------|
| Date              | 2013/11/19 10:03 |
| File name         | AP-6.jws         |
| Model             | J-810            |
| Serial No.        | B050560750       |
| Band width        | 1 nm             |
| Response          | 1 sec            |
| Sensitivity       | Standard         |
| Measurement range | 400 - 200 nm     |
| Data pitch        | 1nm              |
| Scanning speed    | 100 nm/min       |
| Accumulation      | 1                |
| Cell Length       | 0.1 cm           |
| Solvent           | MeOH             |
| Temperature       | Room Temperature |
| Sample name       | AP-6             |
| Operator          | DEMO             |

S29. <sup>1</sup>H NMR spectrum of compound 4 (300 MHz, CD<sub>3</sub>OD)

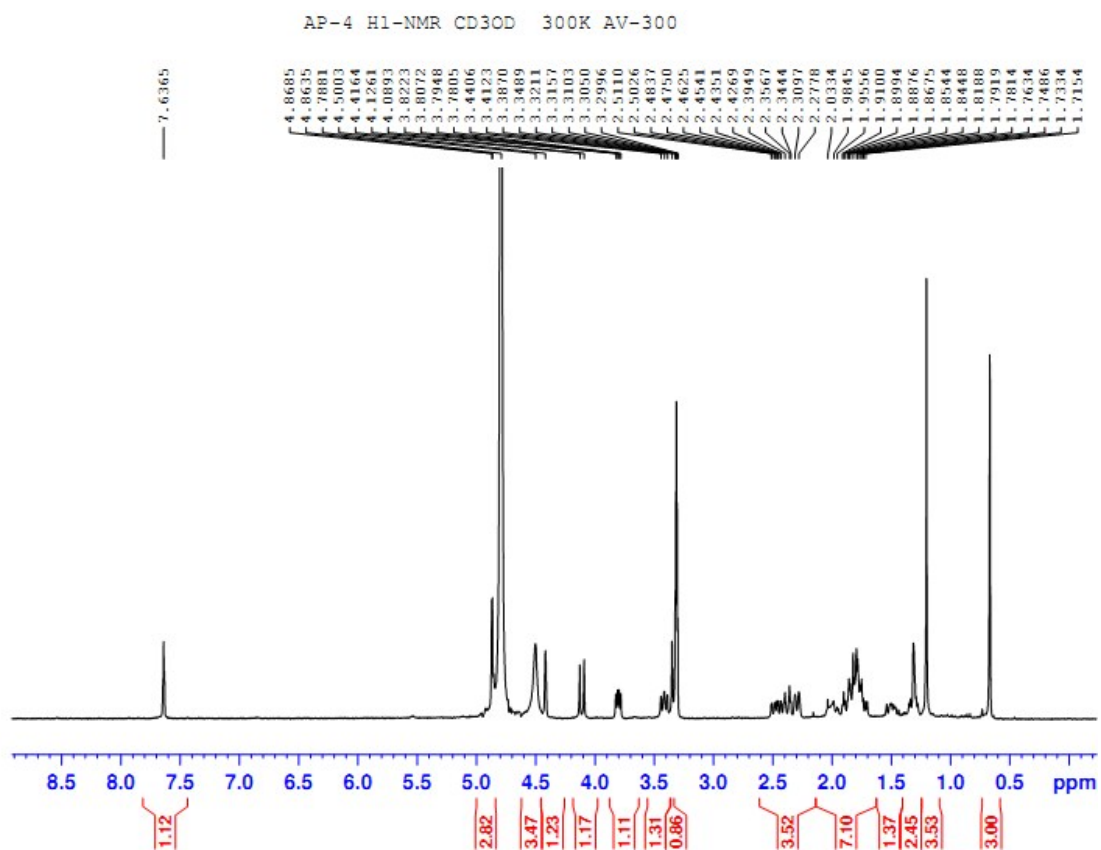

S30. <sup>13</sup>C NMR spectrum of compound 4 (75 MHz, CD<sub>3</sub>OD)

AP-4 <sup>13</sup>C-NMR CD3OD 300K AV-300

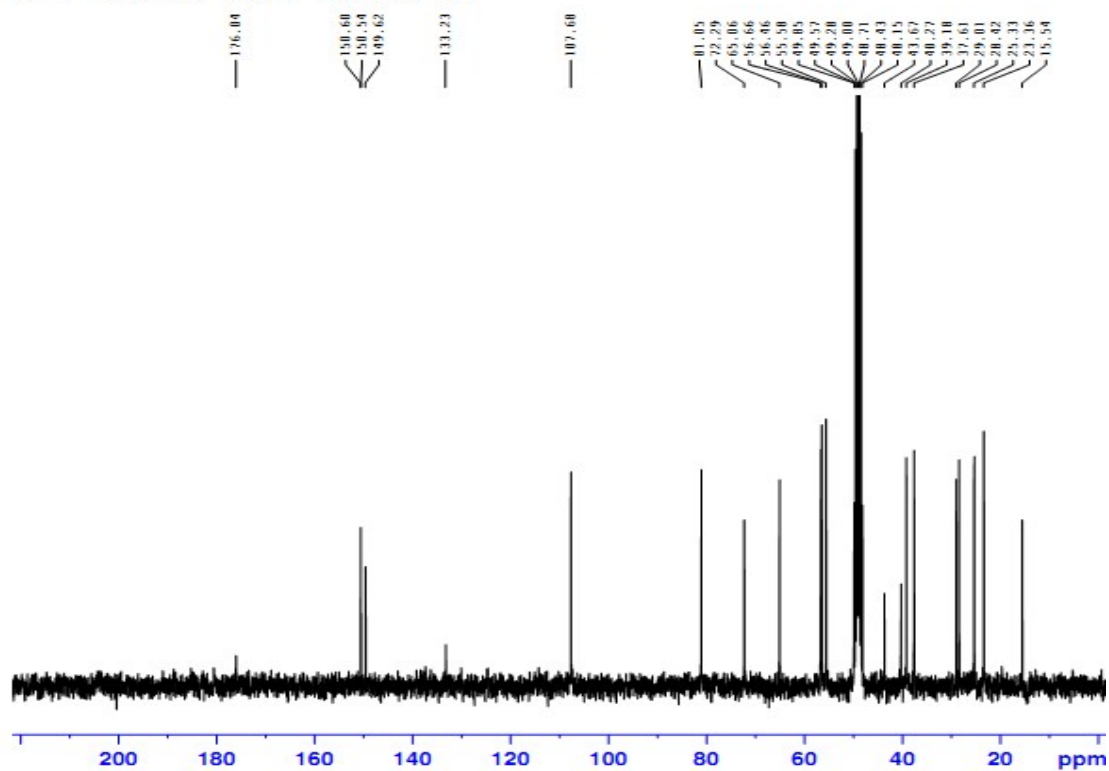



### S31. HRESIMS spectrum of compound 4

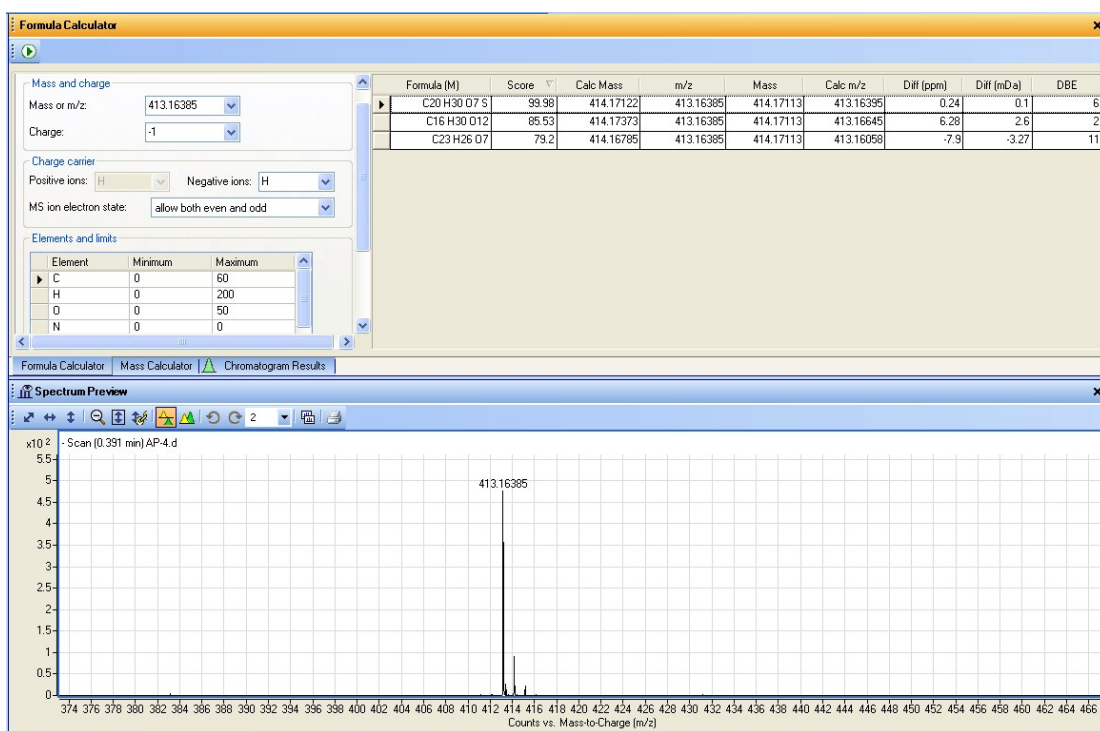

### S32. IR spectrum of compound 4

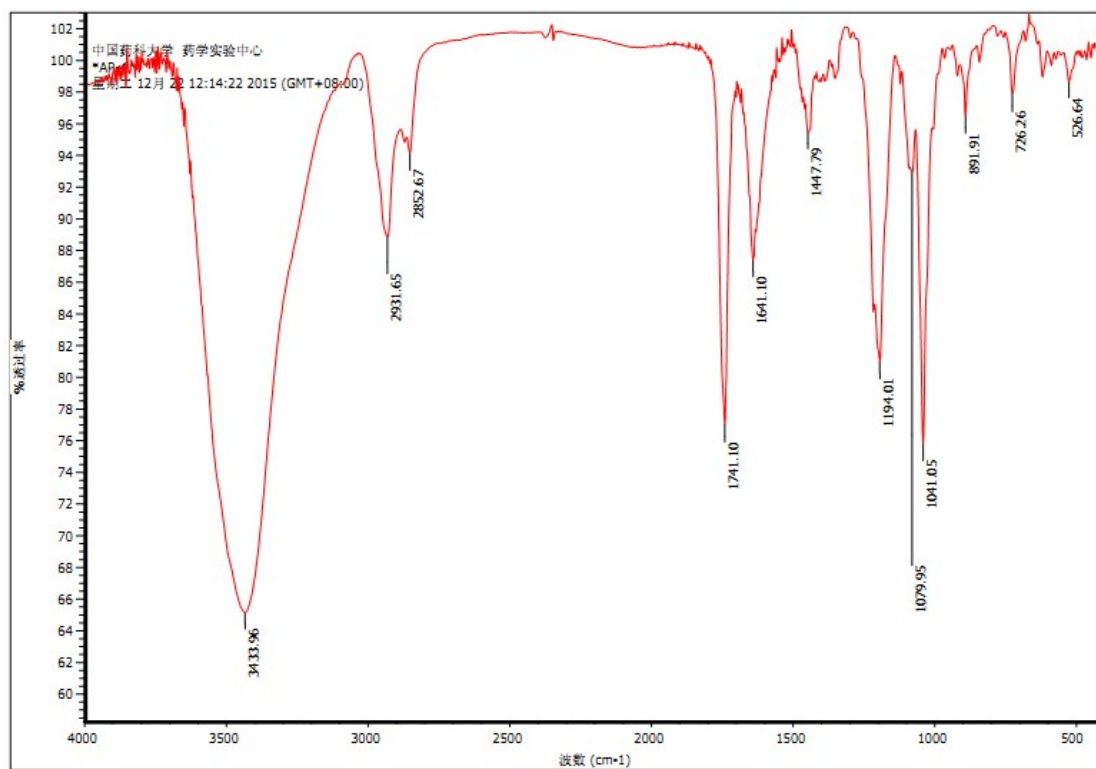

### S33. UV spectrum of compound 4 (MeOH)

Data Set: ap\_4 - RawData

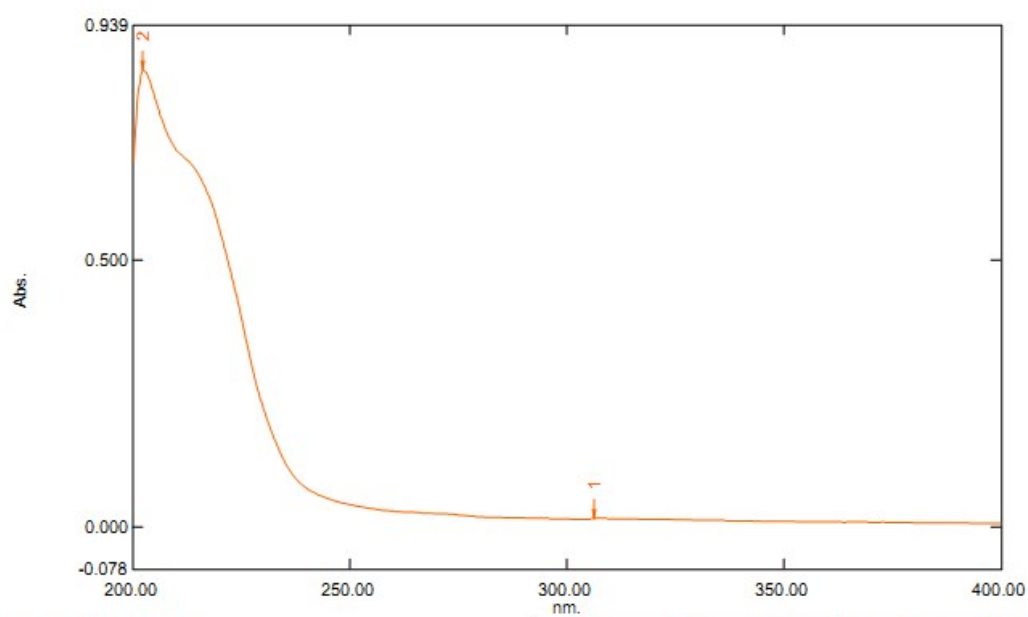

Measurement Properties  
Wavelength Range (nm.): 200.00 to 400.00  
Scan Speed: Fast  
Sampling Interval: 0.2  
Auto Sampling Interval: Disabled

| No. | P/V | Wavelength | Abs.  | Description |
|-----|-----|------------|-------|-------------|
| 1   | ⊕   | 306.20     | 0.017 |             |
| 2   | ⊕   | 202.20     | 0.854 |             |
| 3   | ⊕   | 304.40     | 0.014 |             |

S34. <sup>1</sup>H NMR spectrum of compound 5 (300 MHz, CD<sub>3</sub>OD)

AP-5 H1-NMR CD3OD 300K AV-300

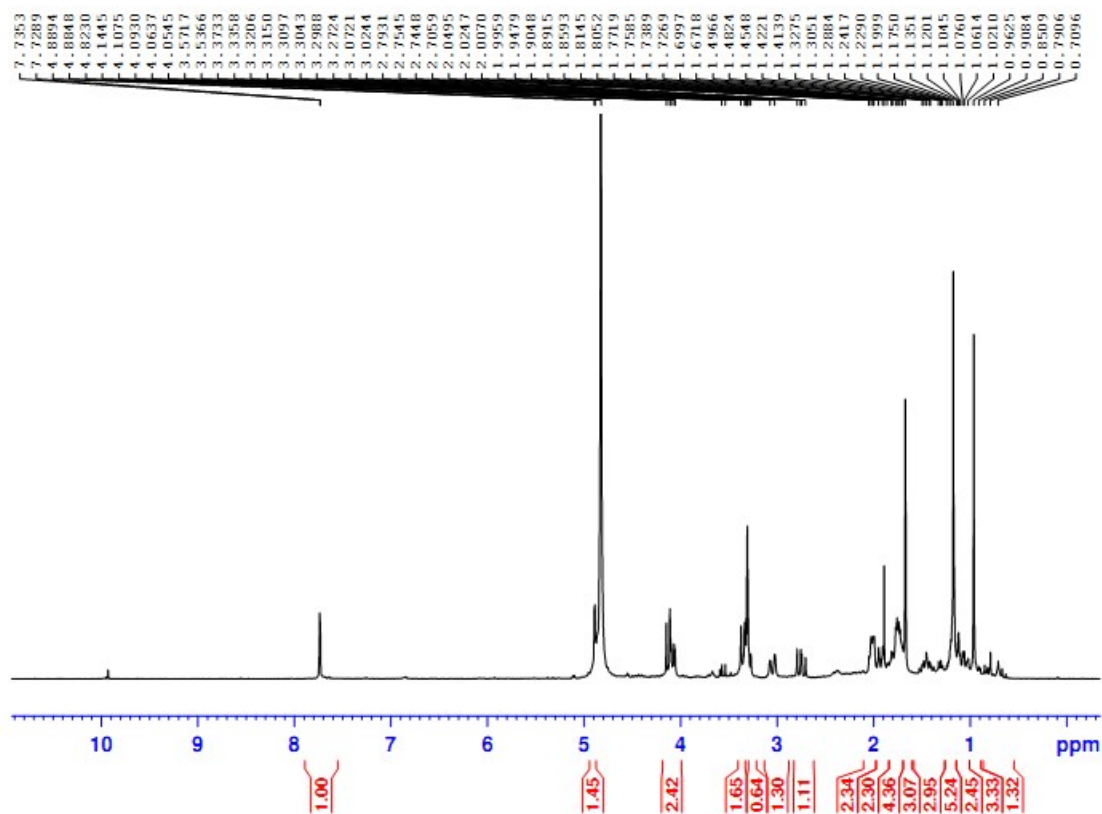

S35.  $^{13}\text{C}$  NMR spectrum of compound **5** (75 MHz,  $\text{CD}_3\text{OD}$ )

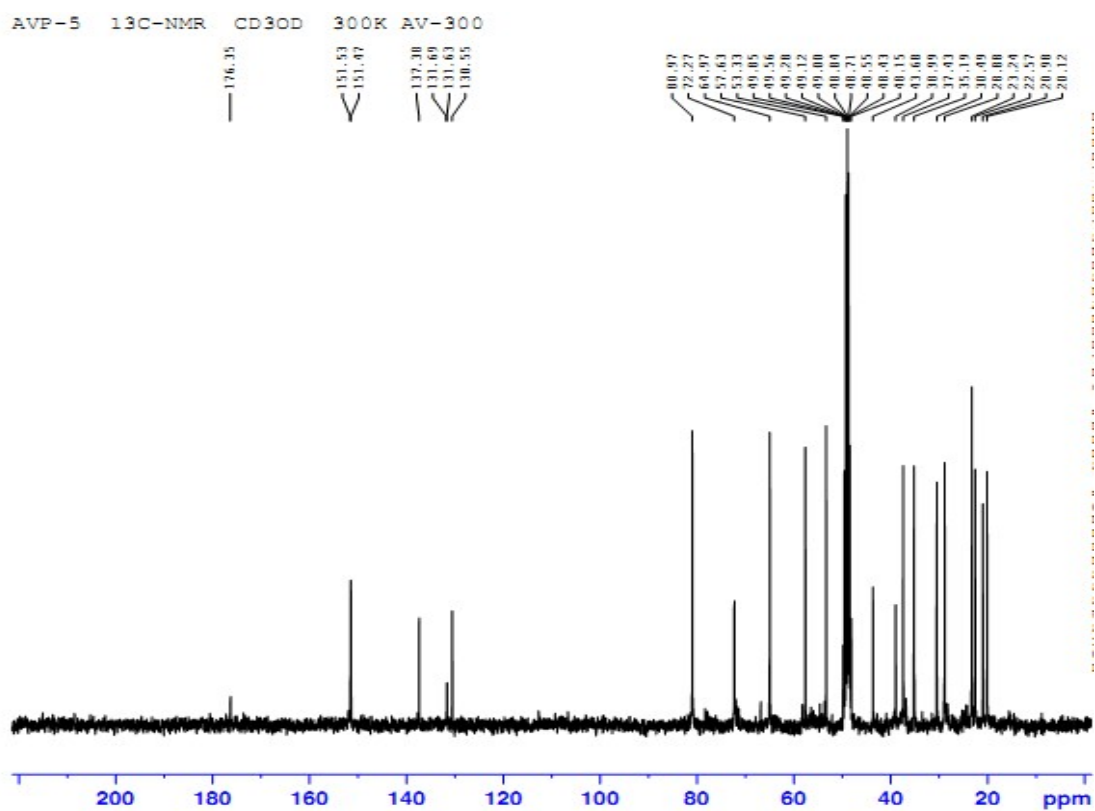

S36.  $^1\text{H}$ - $^1\text{H}$  COSY spectrum of compound 5

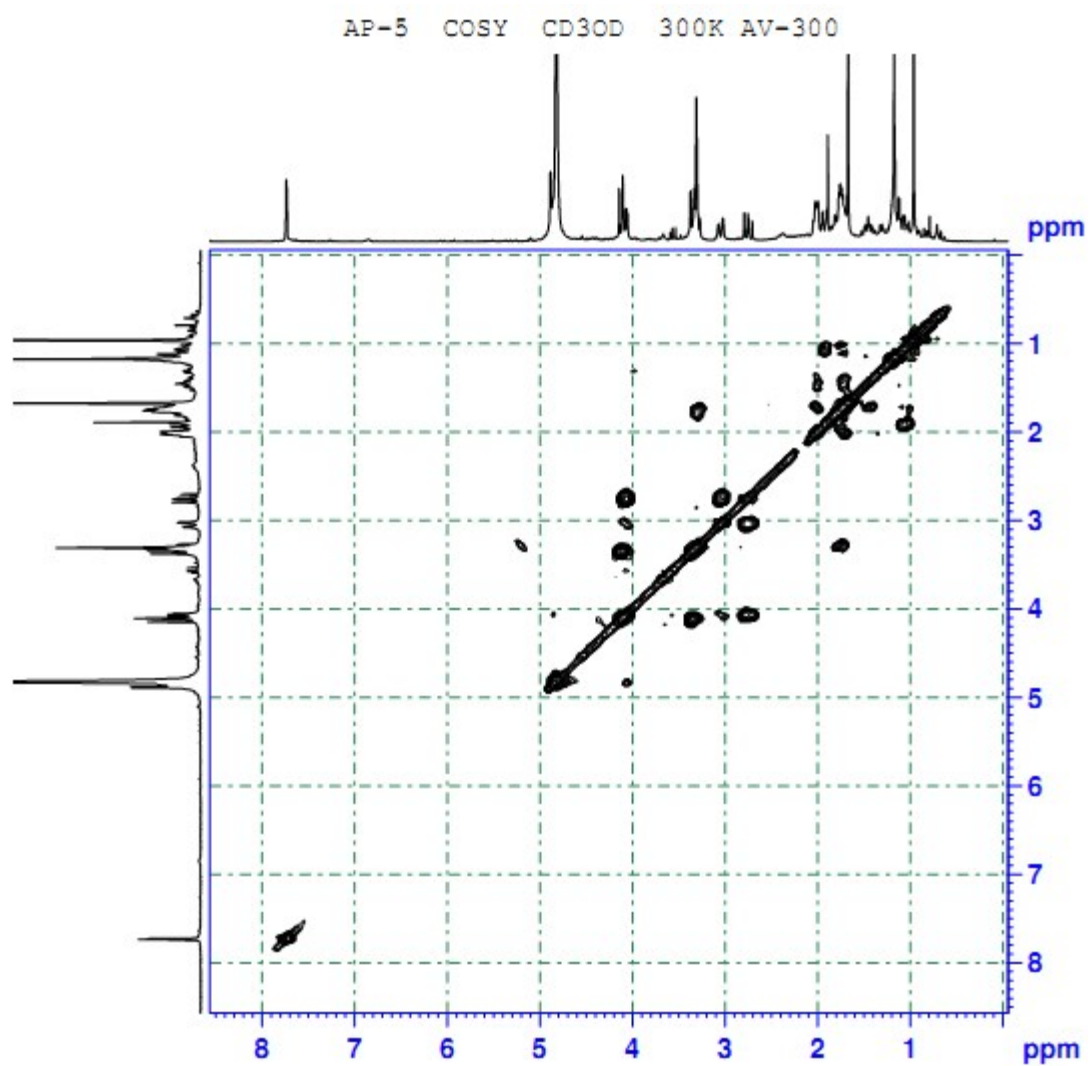

S37. HSQC spectrum of compound 5

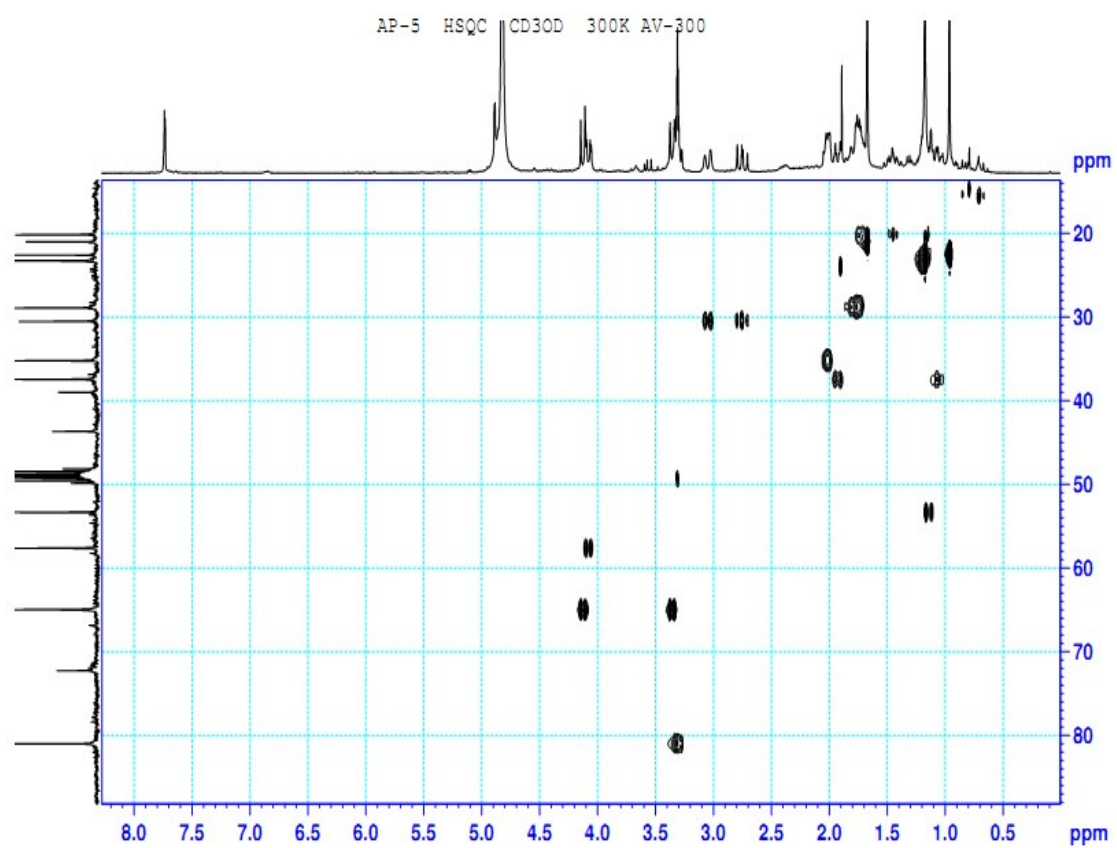

S38.HMBC spectrum of compound 5

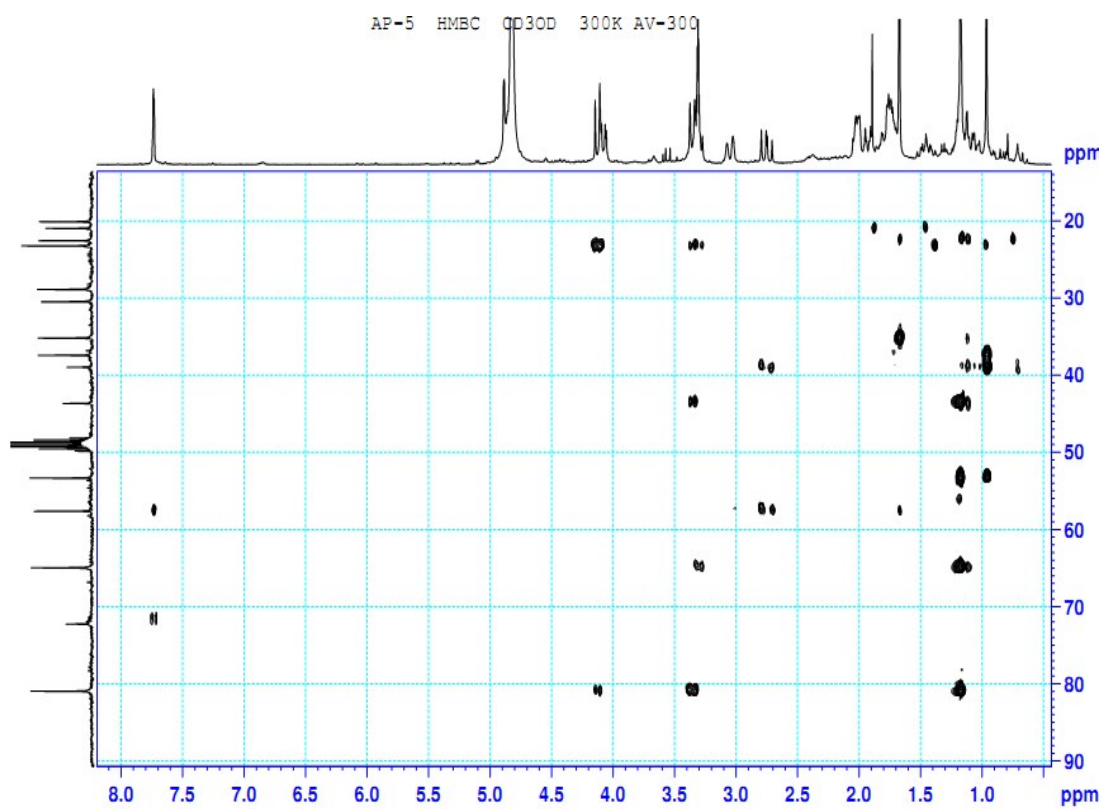



S39. ROESY spectrum of compound 5

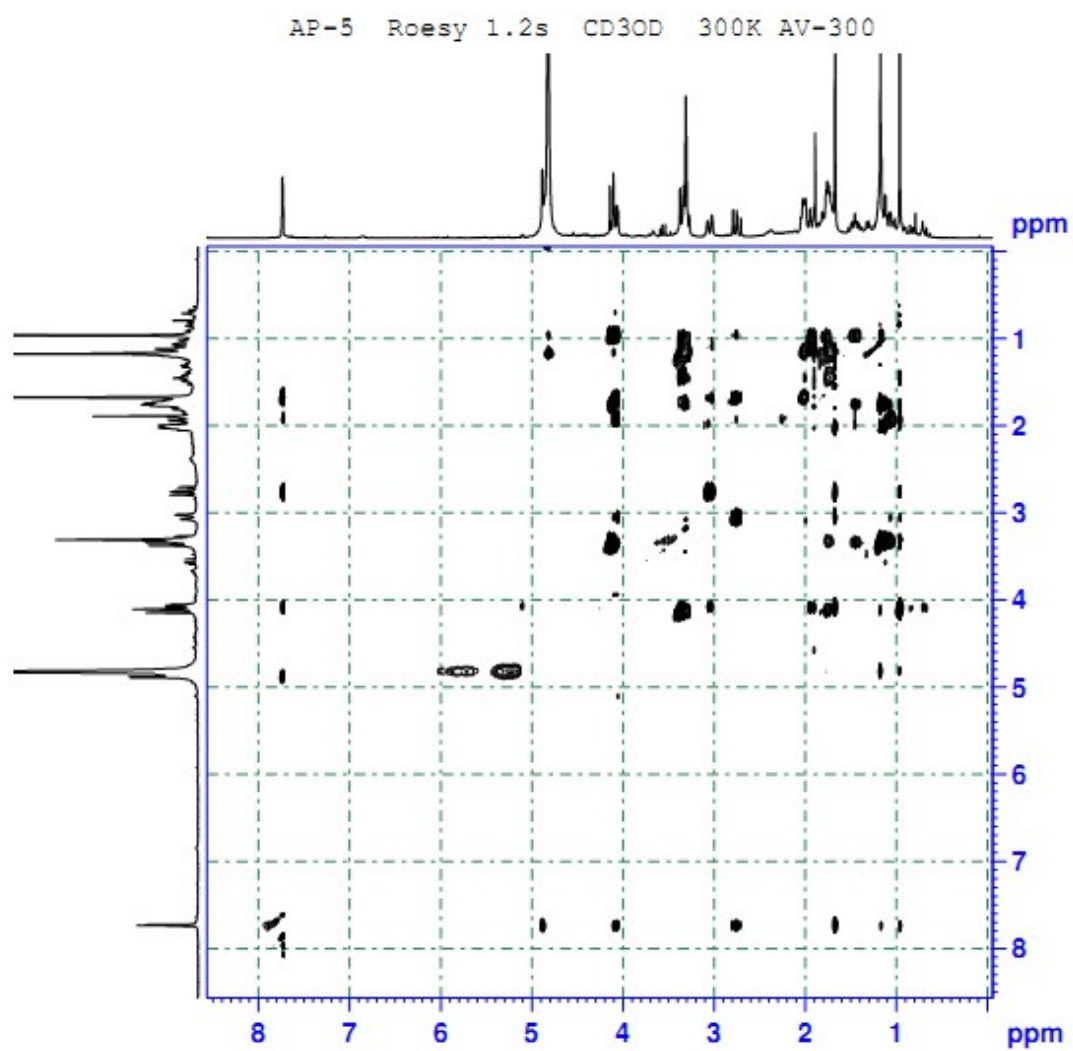

## S40. HRESIMS spectrum of compound 5

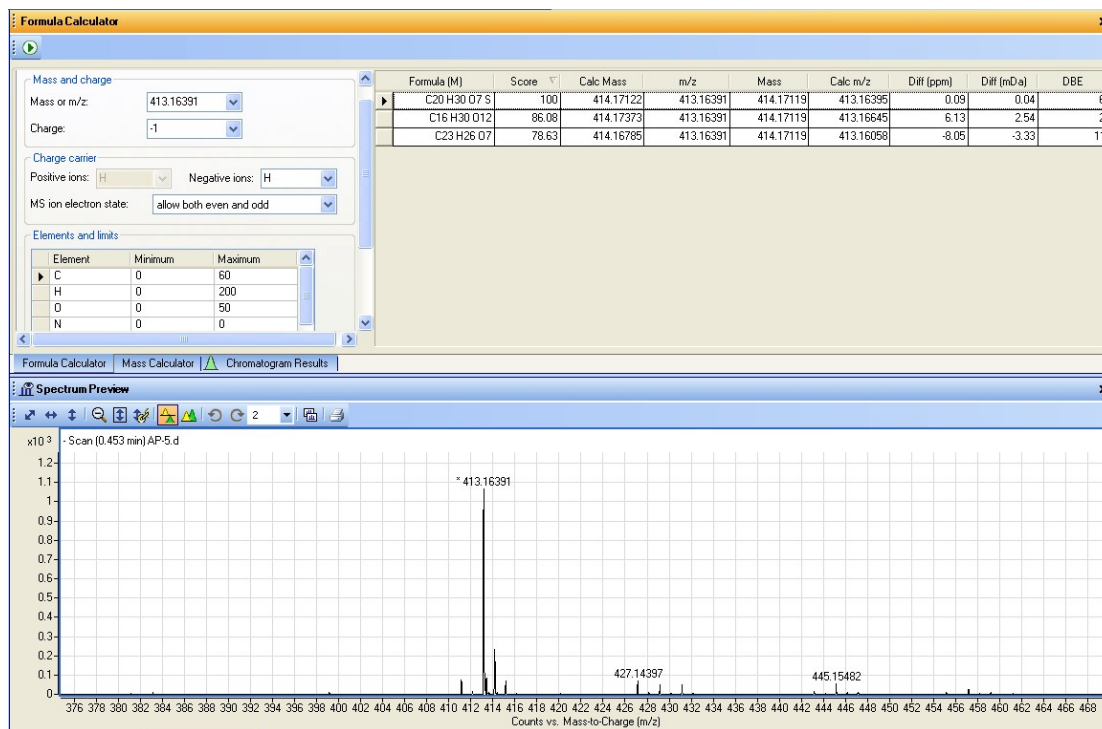

### S41. IR spectrum of compound 5

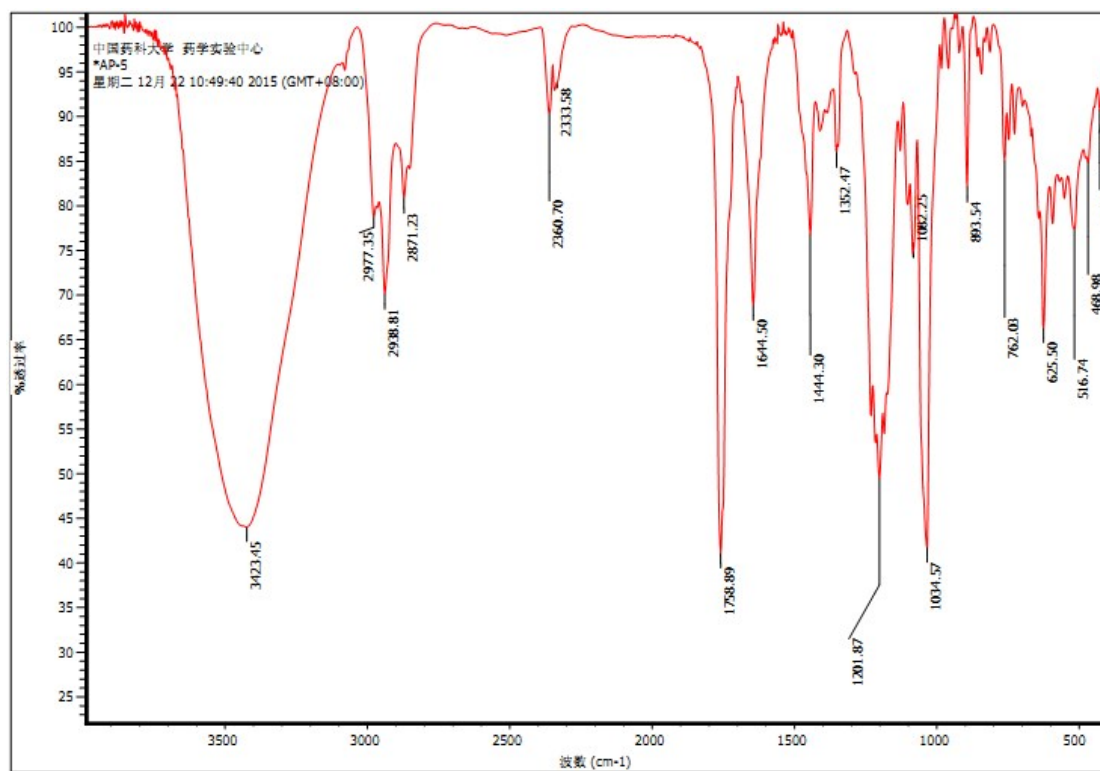

## S42. UV spectrum of compound 5 (MeOH)

Data Set: ap\_5 - RawData

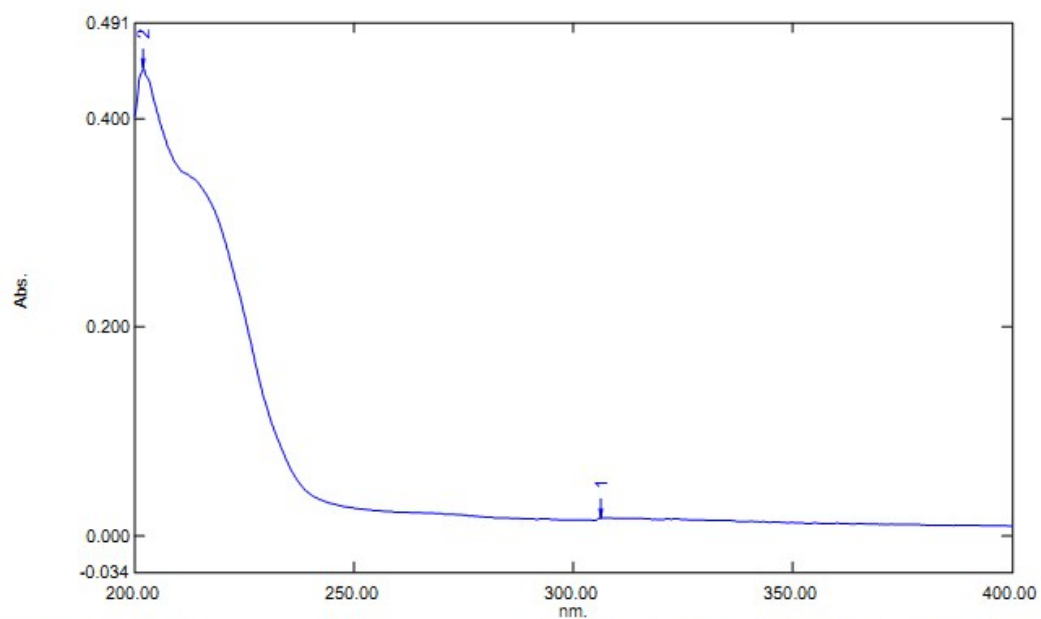

Measurement Properties  
Wavelength Range (nm.): 200.00 to 400.00  
Scan Speed: Fast  
Sampling Interval: 0.2  
Auto Sampling Interval: Disabled

| No. | P/V | Wavelength | Abs.  | Description |
|-----|-----|------------|-------|-------------|
| 1   | ⊕   | 306.20     | 0.018 |             |
| 2   | ⊕   | 202.00     | 0.447 |             |
| 3   | ⊕   | 304.60     | 0.015 |             |

### S43. CD spectrum of compound 5 (MeOH)

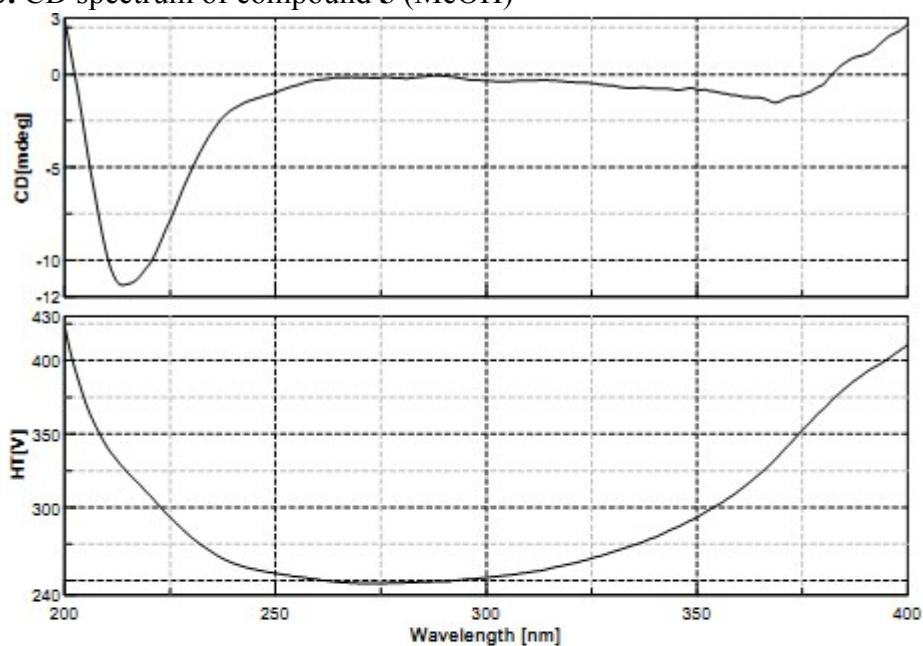

|                   |                  |
|-------------------|------------------|
| Date              | 2013/11/19 10:08 |
| File name         | AP-5.jws         |
| Model             | J-810            |
| Serial No.        | B050560750       |
| Band width        | 1 nm             |
| Response          | 1 sec            |
| Sensitivity       | Standard         |
| Measurement range | 400 - 200 nm     |
| Data pitch        | 1nm              |
| Scanning speed    | 100 nm/min       |
| Accumulation      | 1                |
| Cell Length       | 0.1 cm           |
| Solvent           | MeOH             |
| Temperature       | Room Temperature |
| Sample name       | AP-5             |
| Operator          | DEMO             |

S44. <sup>1</sup>H NMR spectrum of compound 6 (300 MHz, CD<sub>3</sub>OD)

AP-7 H1 NMR CD3OD 300K AV-300

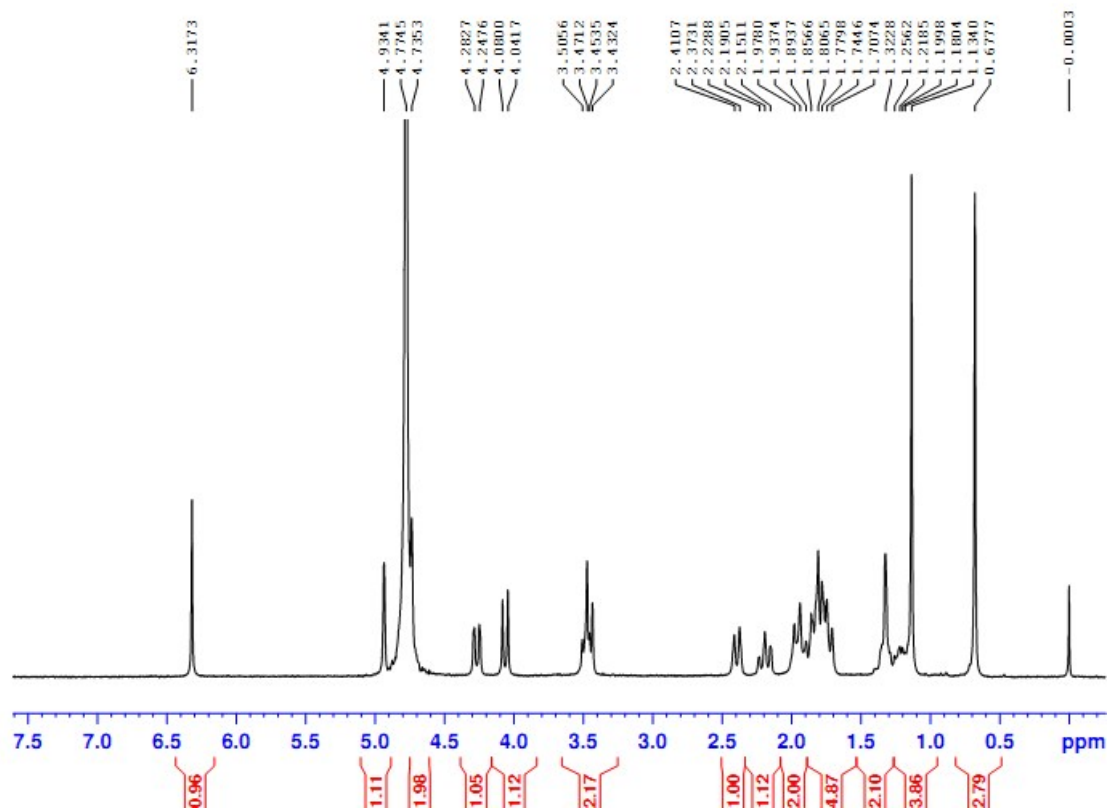

S45.  $^{13}\text{C}$  NMR spectrum of compound **6** (75 MHz,  $\text{CD}_3\text{OD}$ )

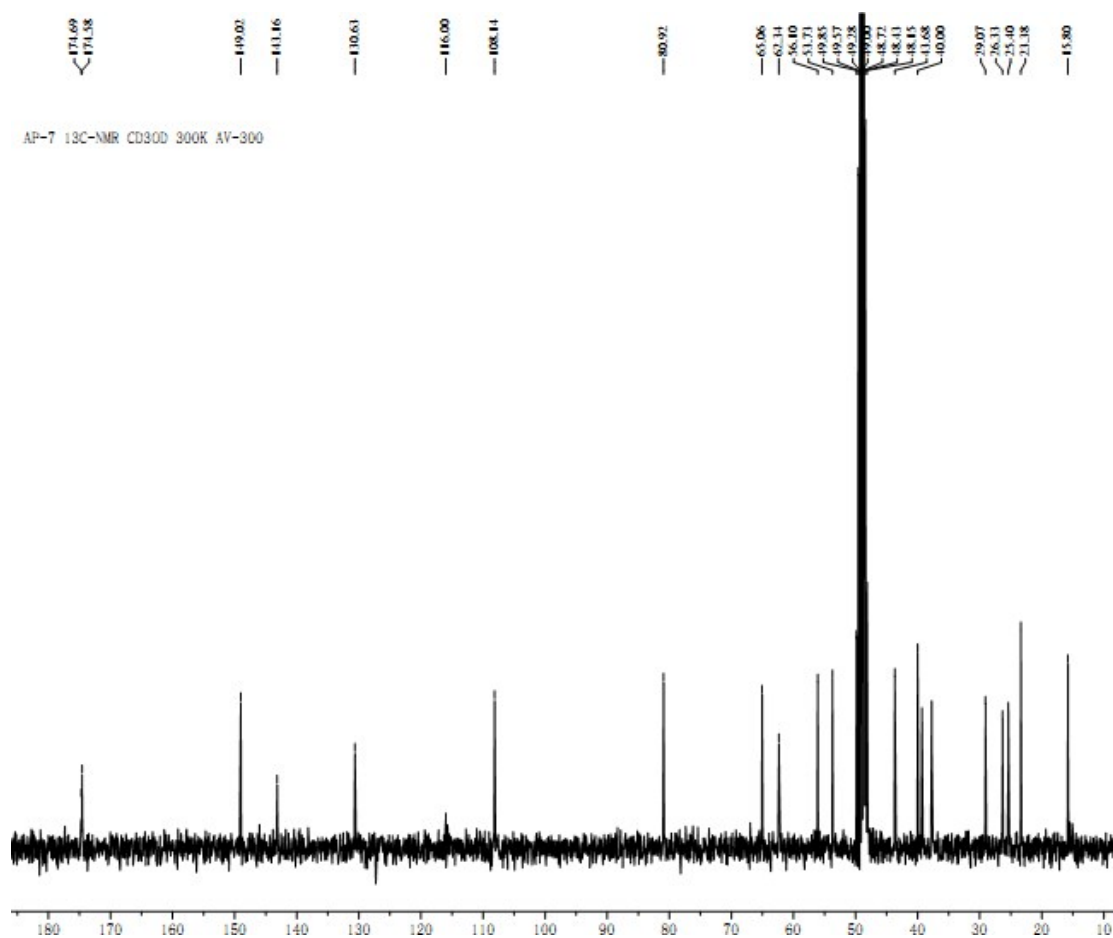

S46.  $^1\text{H}$ - $^1\text{H}$  COSY spectrum of compound 6

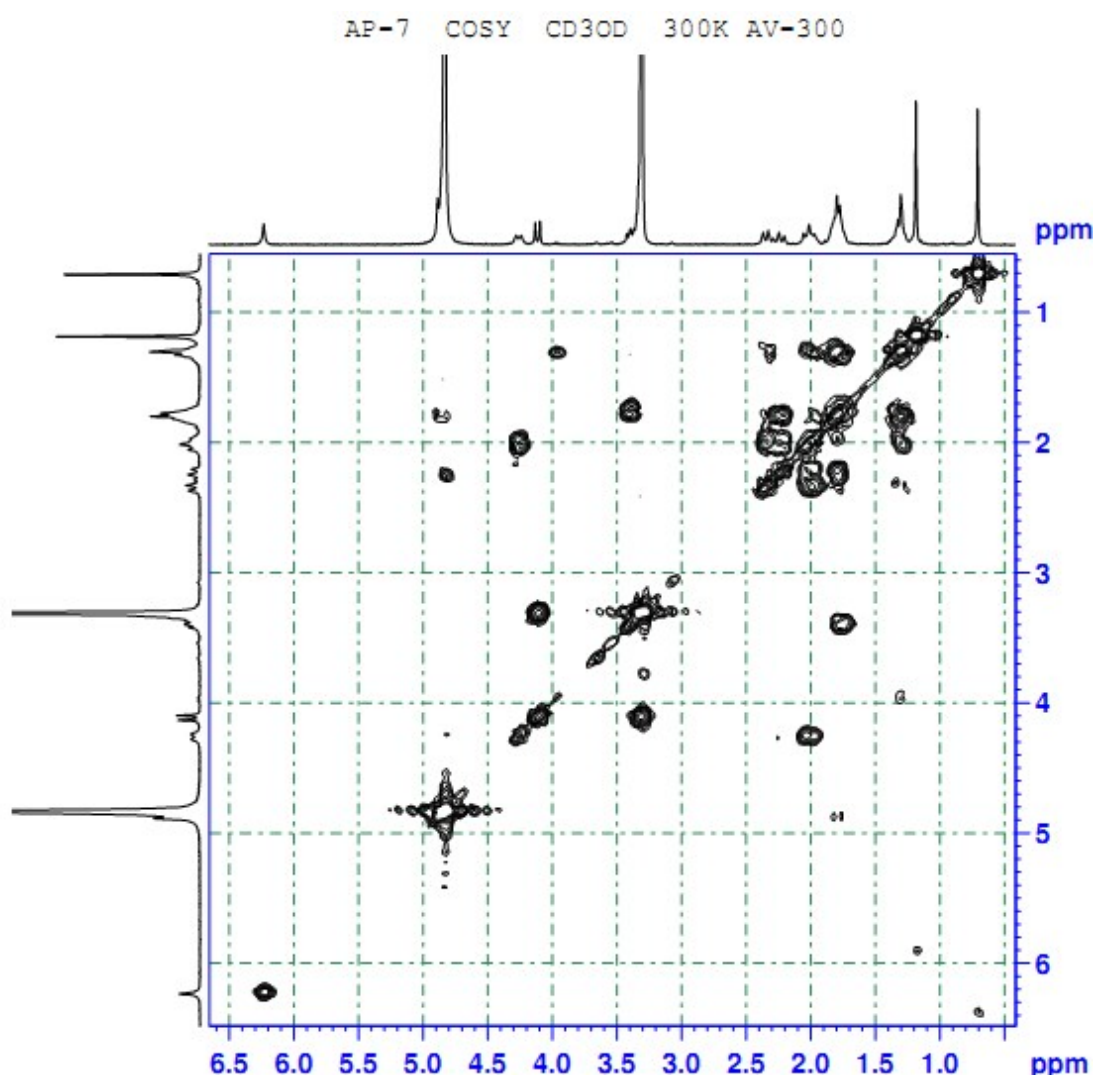



### S47. HSQC spectrum of compound 6

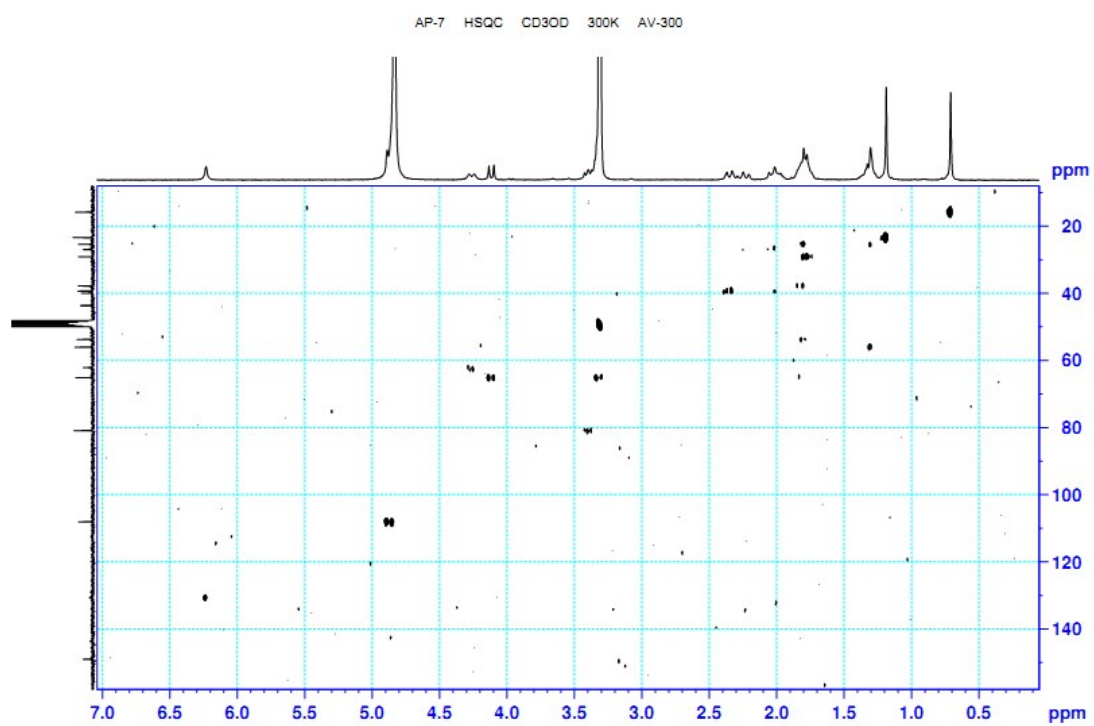

# S48.HMBC spectrum of compound 6

AP-7 HMBC CD3OD 300K AV-300

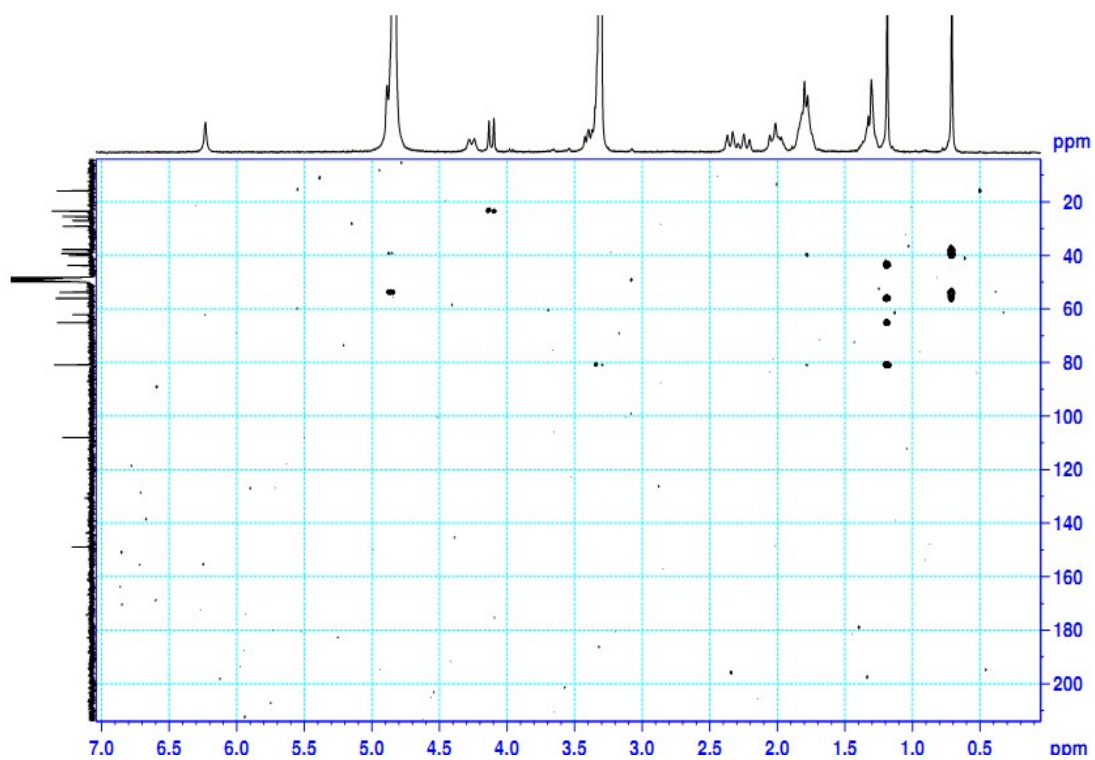

S49. ROESY spectrum of compound 6

AP-7 Roesy 1,2s CD3OD 300K AV-300

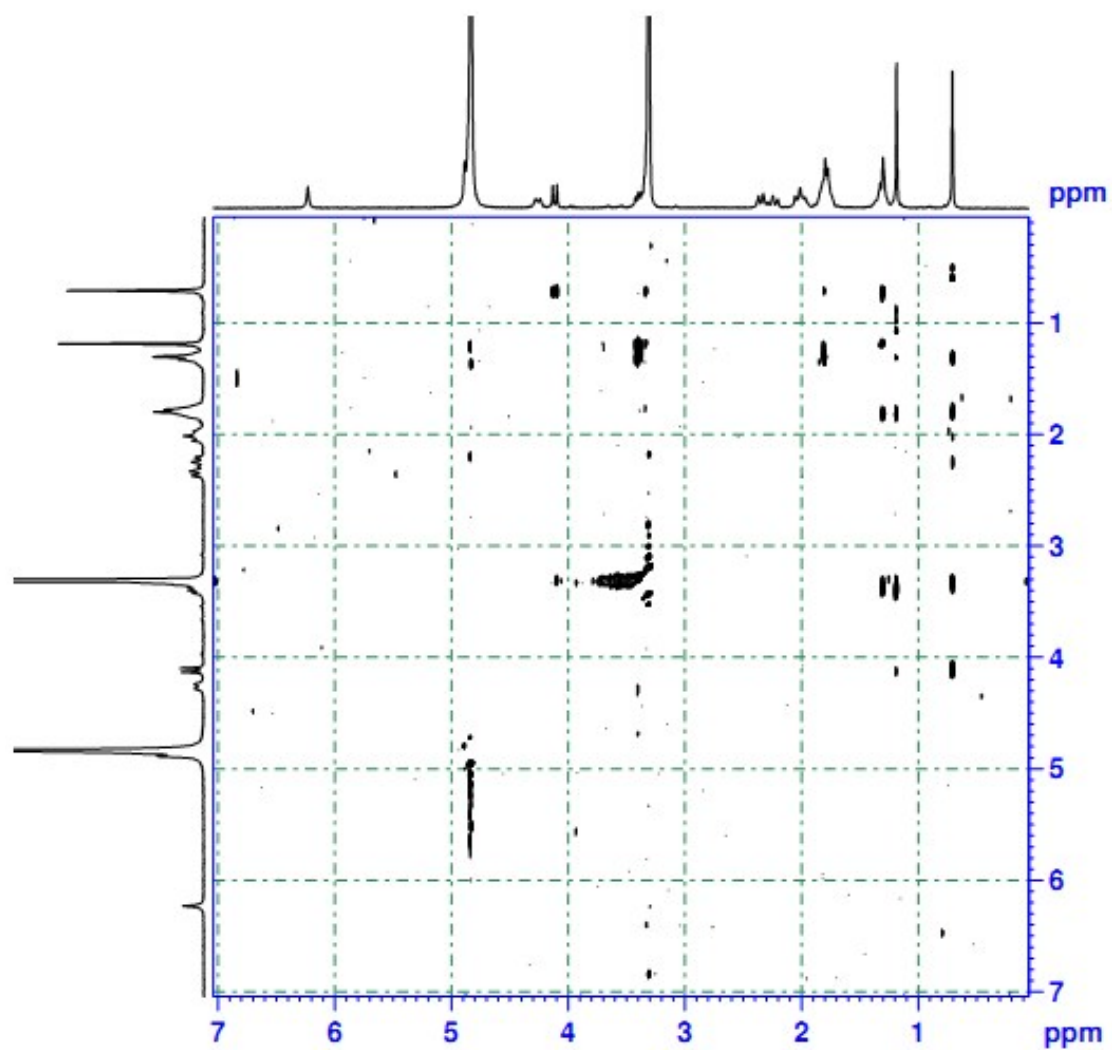

## S50. HRESIMS spectrum of compound 6

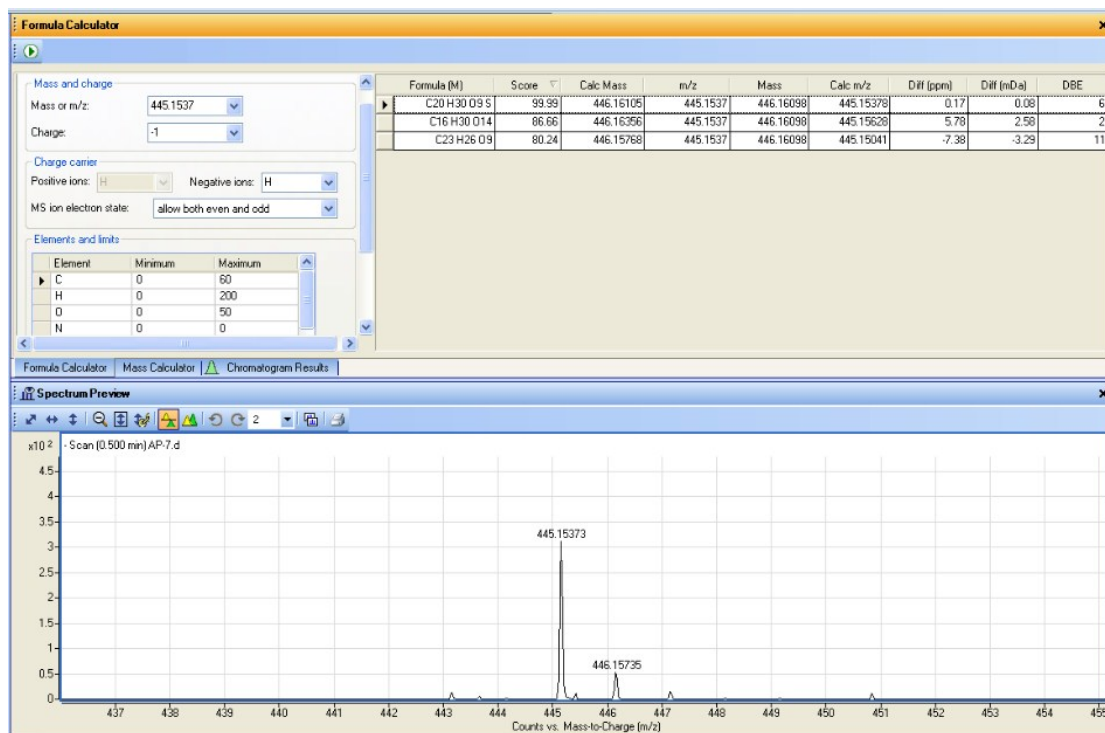

### S51. IR spectrum of compound 6

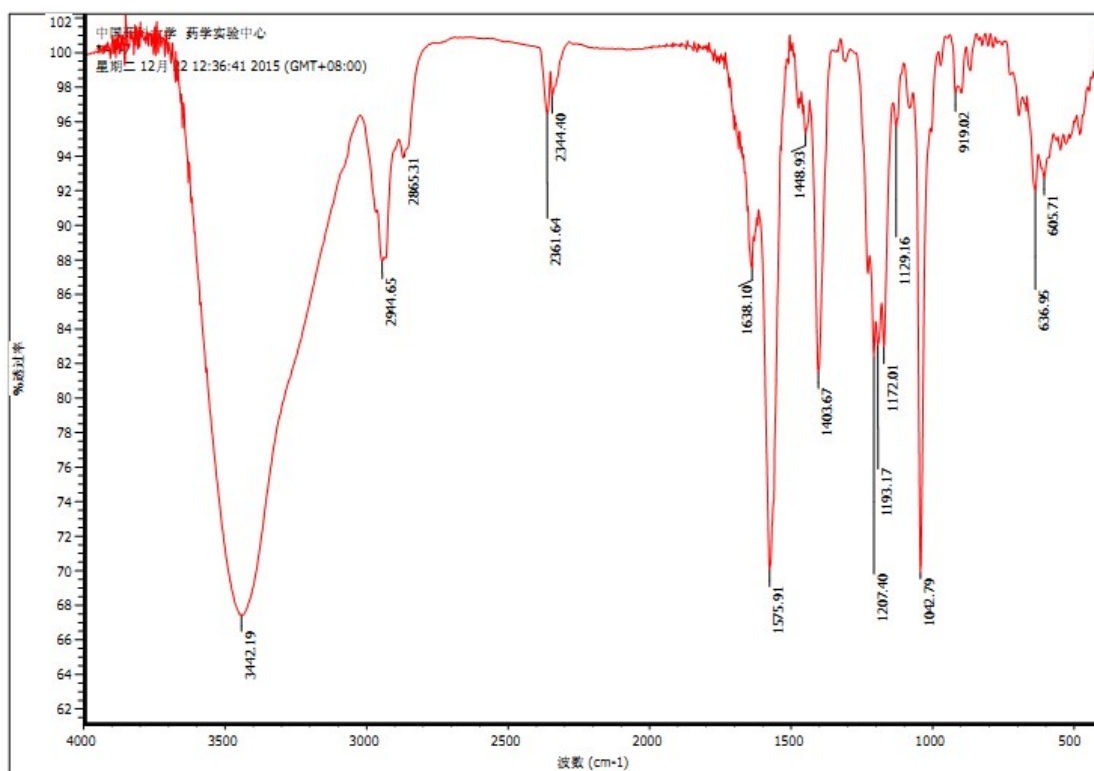

## S52. UV spectrum of compound 6 (MeOH)

Data Set: ap-7 - RawData

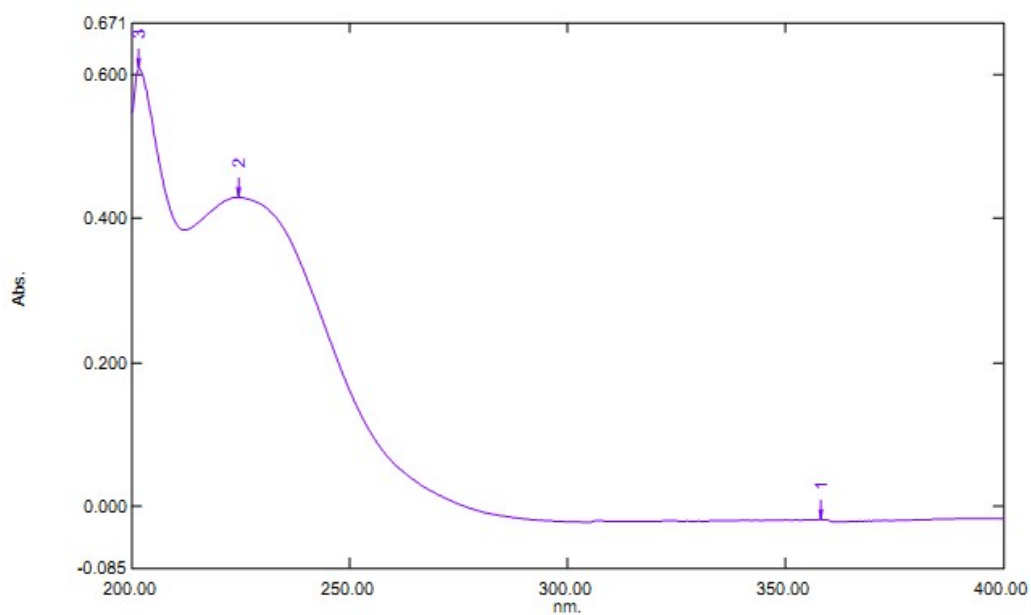

Measurement Properties  
Wavelength Range (nm.): 200.00 to 400.00  
Scan Speed: Fast  
Sampling Interval: 0.2  
Auto Sampling Interval: Disabled  
Scan Mode: Auto

| No. | P/V | Wavelength | Abs.   | Description |
|-----|-----|------------|--------|-------------|
| 1   | ⓘ   | 358.00     | -0.018 |             |
| 2   | ⓘ   | 224.40     | 0.430  |             |
| 3   | ⓘ   | 201.60     | 0.608  |             |
| 4   | Ⓜ   | 304.20     | -0.022 |             |
| 5   | Ⓜ   | 212.00     | 0.384  |             |

### S53. CD spectrum of compound 6 (MeOH)

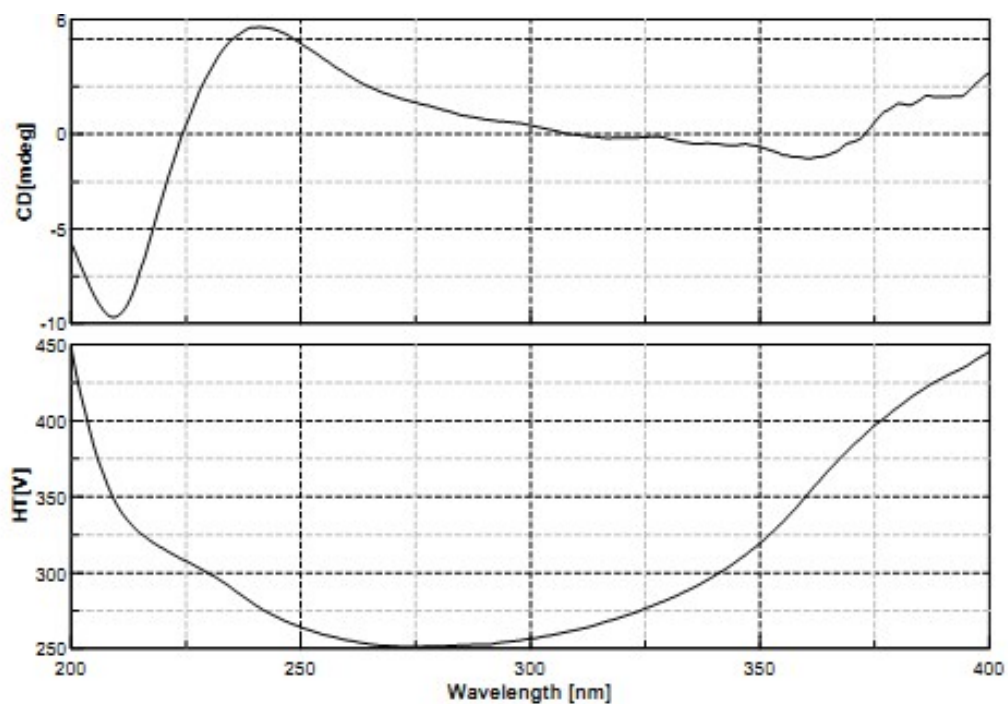

|                   |                  |
|-------------------|------------------|
| Date              | 2013/12/16 10:29 |
| File name         | AP-7.jws         |
| Model             | J-810            |
| Serial No.        | B050560750       |
| Band width        | 1 nm             |
| Response          | 1 sec            |
| Sensitivity       | Standard         |
| Measurement range | 400 - 200 nm     |
| Data pitch        | 1nm              |
| Scanning speed    | 100 nm/min       |
| Accumulation      | 1                |
| Cell Length       | 0.1 cm           |
| Solvent           | MeOH             |
| Temperature       | Room Temperature |
| Sample name       | AP-7             |
| Operator          | DEMO             |
